# Supplementary material
Source: PubMed Central journal article supplement (PMC4640624)
Supplement: 1500183_SM.pdf [file 1500183_SM.pdf]

## Supplementary Materials for The microbiome of uncontacted Amerindians

Jose C. Clemente, Erica C. Pehrsson, Martin J. Blaser, Kuldip Sandhu, Zhan Gao, Bin Wang, Magda Magris, Glida Hidalgo, Monica Contreras, Óscar Noya-Alarcón, Orlana Lander, Jeremy McDonald, Mike Cox, Jens Walter, Phaik Lyn Oh, Jean F. Ruiz, Selena Rodriguez, Nan Shen, Se Jin Song, Jessica Metcalf, Rob Knight, Gautam Dantas, M. Gloria Dominguez-Bello

Published 17 April 2015, *Sci. Adv.* **1**, e1500183 (2015)  
DOI: 10.1126/sciadv.1500183

### The PDF file includes:

#### Text

Table S1. Samples obtained from the 34 Amerindian subjects included in this study: skin from right (BD) or left (BI) forearm ( $n = 28$ ), oral ( $n = 28$ ), and fecal ( $n = 12$ ) specimens.

Table S2. Composition of Amerindian *E. coli* isolate genomic libraries.

Table S3. Functional capture of AR genes from Amerindian *E. coli* isolate genomic libraries.

Table S4. AR genes identified from functional selections of Amerindian *E. coli* isolate genomic libraries and Amerindian and Puerto Rican metagenomic libraries.

Table S5. Composition of metagenomic libraries from Amerindian and Puerto Rican fecal and oral microbiota.

Table S6. Antibiotics used in genomic and metagenomic library selections for AR genes.

Table S10. List of clusters at different k-mer and minimum contig length and their associated taxonomy.

Table S11. Taxa of 329 bacterial strains cultured from feces of 12 isolated Amerindians.

Table S12. Typing of 24 *E. coli* strains from 11 isolated Amerindians.

Fig. S1. Meta-analysis of 16S V4 region fecal data.

Fig. S2. Microbiome diversity between different human groups.

Fig. S3. Microbiota diversity in fecal, oral, and skin samples from uncontacted Yanomami in relation to U.S. subjects using the V2 region of the 16S *rRNA* gene.

Fig. S4. Taxonomic distribution across gut samples sorted by the dominant genera within each population.

Fig. S5. Prevalence/abundance curves of representative bacterial OTUs in feces (A), oral (B), and skin (C).

Fig. S6. ClonalFrame analysis of *Escherichia coli* strains based on the sequence of seven housekeeping genes.

Fig. S7. PCoA plot of Yanomami, Malawian, and Guahibo fecal samples.

Fig. S8. Fecal microbiome of non-*Bacteroides* OTUs in Yanomami, Malawian, Guahibo, and U.S. samples.

Fig. S9. Bacterial diversity as a function of age and body site.

Fig. S10. Procrustes analyses of shotgun metagenomic and 16S rRNA data for different subsets of samples.

Fig. S11. Comparison of PICRUSt versus sequenced shotgun metagenomes of fecal and oral samples with at least 10,000 mapped reads.

Fig. S12. Bacterial genome assembly.

References (72–76)

**Other Supplementary Material for this manuscript includes the following:**

(available at [www.advances.sciencemag.org/cgi/content/full/1/3/e1500183/DC1](http://www.advances.sciencemag.org/cgi/content/full/1/3/e1500183/DC1))

Table S7 (Microsoft Excel format). List of all taxa significantly associated with each population in fecal samples as determined by LEfSe analysis.

Table S8 (Microsoft Excel format). List of all taxa significantly associated with each population in oral samples as determined by LEfSe analysis.

Table S9 (Microsoft Excel format). List of all taxa significantly associated with each population in skin samples as determined by LEfSe analysis.

## Supplementary Materials

### 16S rRNA sequences

Quality-filtered, demultiplexed sequences from fecal samples were combined with those from a previous study that included a US population, and two semi-acclimated non-Western populations<sup>11</sup>. All sequences were trimmed at 100bp to avoid biases due to read length. We performed open-reference OTU picking<sup>72</sup> at 97% identity to identify both characterized and novel taxa, and taxonomy was assigned using Greengenes version 13\_8<sup>73</sup>. Oral and skin samples were processed in a similar manner combined with data from the American Gut project instead. In fecal samples, we obtained 768,221 sequences for Yanomami subjects ( $69,838 \pm 6,630$  seqs/sample), 913,44 for Guahibo ( $13,238 \pm 6,338$ ), 820,776 for Malawians ( $15,199 \pm 3,152$ ), and 4,510,511 for US ( $17,281 \pm 4,459$ ). In oral samples, we obtained 1,820,607 sequences for Yanomami ( $67,429 \pm 16,553$ ) and 890,367 for US ( $21,716 \pm 7,388$ ). In skin samples, we obtained 1,516,780 sequences for Yanomami ( $54,170 \pm 9,571$ ) and 872,475 for US ( $18,563 \pm 9,380$ ). Since the oral and skin sites sampled in the Yanomami (buccal mucosa, volar forearm) were physically close but not identical to the sites sampled in US subjects (tongue, hand palm), we compared the distances per body site between the populations against those obtained from sub-body sites (i.e. buccal mucosa versus tongue, hand versus forearm) within populations. We found that the distances between populations for both oral and skin samples are significantly larger than distances between sub-body sites within a population (t-test,  $p < 0.01$ ; **Fig. S2F**), indicating that our results are robust.

Bacterial diversity in feces and skin, but not in the mouth, was significantly higher in Yanomami than in US subjects (**Fig. 1A, 1E, 1I**). Noticeably, fecal diversity was higher than in the semi-transcultured Guahibo Amerindians (ANOVA and Tukey's HSD test  $p < 0.001$ ; **Fig. 1A**). PCoA of UniFrac distances reveals that bacterial communities from each body site segregate Westernized people from agrarian and hunter-gatherer groups (**Figs. 1B, 1F, 1J, and S1**).

### Metagenome prediction and pathway analysis

We used PICRUSt 1.0.0<sup>18</sup> with default parameters to predict metagenomic content from the 16S rRNA data. KEGG Ortholog (KO) counts were thus assigned to each sample, and KEGG pathways annotated to each KO. STAMP<sup>43</sup> was then utilized in combination with ANOVA with the Tukey-Kramer post-hoc test and Bonferroni correction for multiple comparisons to detect pathways differentially abundant across populations. Effect sizes were measured using  $\eta^2$  (eta-squared).

### Shotgun metagenomic sequencing and pre-processing

We used the Illumina Nextera® kit to perform shotgun metagenomic sequencing of 22 samples (8 fecal, 14 oral). 1  $\mu$ L of metagenomic DNA from each sample was used as starting material. The dual-index multiplexed library was sequenced on an Illumina NextSeq (2x150bp). Shotgun reads were demultiplexed, allowing two mismatches per index, and trimmed with Trimmomatic v.0.30<sup>74</sup> in paired-end palindrome mode to remove Nextera adapter sequences and low quality (<Q13) bases from the ends (minimum length 36 bases).

### Computational filtering of assembled contigs from metagenomic libraries

From the sequenced Amerindian MDA NTCs, 2321 contigs assembled. By comparison to NCBI nt (August 15, 2013), all but five contigs aligned most closely to *Escherichia* species (including one in which *E. coli* was the second hit); the remaining contigs align most closely to cloning vectors, Taq polymerase, or rabbit hemoglobin, all of which are commonly used molecular biology tools, trace amounts of which may have been present in the MDA reagents.

Under our extremely stringent exclusion criteria (see Methods), most Amerindian metagenomic library-isolated genes from *E. coli* were excluded, as were many  $\beta$ -lactamases that aligned to a cloning vector on a NTC contig. The excluded contigs likely include some true AR genes present in

the Amerindian microbiota, but we gave exclusion of false positives greater priority in this investigation due to the unique nature of the samples. We were also able to recover some of the true positives excluded by NTC-masking by separately interrogating cultured *E. coli* isolates from the Amerindian individuals.

### **Novel resistance gene with unknown function**

The AR genes isolated from the Amerindian metagenomic library selection include a previously unrecognized gene conferring resistance to chloramphenicol, O23\_CH\_19:550-804. The 255bp ORF is unannotated, and the top blastn alignments in NCBI nt are *Neisseria lactamica* plasmids pNL14 and pNL871104, which have no annotation for that region (blastn: 98%, DQ229164.1 and DQ229166.1). The ORF is situated on a 4398bp contig (KJ910975) that contains a number of mobile genetic elements, including a ~1.4kb region spanning an adjacent relaxase/mobilization domain and *mobC* that aligns with 95% nucleotide identity to *Neisseria gonorrhoeae* plasmids (FJ172221.1, CP003910.1). Although this gene is represented in NCBI, its resistance function was previously unrecognized.

### **Mobile genetic elements syntenic with antibiotic resistance genes**

Of the AR genes isolated with functional selections, several are syntenic with mobile genetic elements, including six Amerindian genes (four isolated from metagenomic libraries and two from *E. coli* isolate libraries) and two Puerto Rican genes. O23\_CH\_19 is discussed above. The chloramphenicol acetyltransferases on F6\_CH\_2 are nearly identical and flank a plasmid mobilization element whose closest homolog in NCBI nr is *Oscillibacter* sp. KLE 1728 (WP\_021751621.1; 74% local identity). They share 99-100% nucleotide identity with HMP stool assemblies and a plasmid from the fish pathogen *Aeromonas salmonicida* (GI:500229267). The AraC transcriptional regulators on F23\_CH\_11, Library\_A\_CH\_8, and Library\_B\_CH\_15 have no hits in NCBI nt, but blastx to NCBI nr indicates they are *ramA* homologs, and the top hit for all is *E. coli*. They are also adjacent to transposases that are 94-97% identical to *E. coli* ([ref|WP\\_032270577.1|](#), [ref|WP\\_000343728.1|](#), [ref|WP\\_021499094.1|](#)). Finally, the *tetX* variants on T1003\_TE\_12 and T1003\_TG\_1 are syntenic with integrases.

The ribosomal protection protein on F6\_TE\_1 is not adjacent to a mobile element, but is widespread in industrialized settings. The *tetW* variant aligns to HMP assemblies from stool, oral cavity, nasal cavity, skin, and vaginal sites and with  $\geq 99\%$  nucleotide identity to 32 species in NCBI, including gut commensals from two phyla and *Clostridium difficile* (**Fig. 3D**). *tetW* is also widespread in animal gut microbiota and the environment<sup>75</sup> and is frequently associated with mobile genetic elements. Future research could determine whether the Yanomami genes associated with mobile elements were ubiquitous prior to the antibiotic era, or whether the new antibiotic selective pressure drove their dissemination<sup>76</sup>.

O23 CH 21 is also present in human pathogens, including *Haemophilus influenzae*, *Klebsiella pneumoniae*, and *Vibrio* spp. (**Fig. 3C**). The gene is often flanked by transposases that may contribute to its spread, although not in this context.

### **Alignment of functionally selected Amerindian and Puerto Rican AR genes**

Seven of the Amerindian genes had homologs in fecal and oral metagenomic libraries from five Puerto Rican subjects, also identified by functional selections. Two pairs aligned with  $\geq 95\%$  nucleotide identity: the *tetW* variants from F6\_TE\_1 and 341\_TE\_1 and the *Neisseria* PBPs from O3\_CZ\_2\_1/O3\_CZ\_2\_2 and T1001\_PITZ\_5/T1001\_CZ\_11.

### **Alignment of functionally selected AR genes to the Human Microbiome Project and MetaHIT**

All 108 AR genes were aligned to the HMP and MetaHIT assemblies. Excluding ribosomal protection proteins and tetracycline inactivation proteins, with a few exceptions, genes from the



fecal microbiota align only to HMP stool assemblies and MetaHIT, and genes from the oral microbiota align only to the HMP oral assemblies. The exceptions are genes from the *E. coli* isolates and F5\_PITZ\_3:33-794 (100% amino acid identical to *ydeO* from *E. coli* str. K-12 substr. MG1655), which align to HMP subgingival plaque assemblies with >95% nucleotide ID, representing potential assembly contamination; oral-isolated ABC transporter 337\_TE\_6:2-1678, which aligns to HMP stool with only 75.5% nucleotide ID; and two  $\beta$ -lactamases from oral library 238\_PE\_3, whose top hits in NCBI nr are Enterobacteriaceae, that align to MetaHIT.

**Table S1. Samples obtained from the 34 Amerindian subjects included in this study: skin from right (BD) or left (BI) forearm (n=28), oral (n=28) and fecal (n=12) specimens.**

| Subject ID | Age (y) | Gender | Sampled sites |           |      |       |
|------------|---------|--------|---------------|-----------|------|-------|
|            |         |        | Skin          |           | ORAL | FECAL |
|            |         |        | Left arm      | Right arm |      |       |
| 24         | 4       | m      | BI24          | BD24      | O24  |       |
| 20         | 7       | f      | BI20          | BD20      | O20  |       |
| 23         | 7       | f      | BI23          | BD23      | O23  | H23   |
| 21         | 8       | f      |               | BD21      | O21  |       |
| 1          | 10      | m      | BI1           | BD1       | O1   |       |
| 3          | 11      | m      | BI3           | BD3       | O3   | H3    |
| 11         | 11      | m      | BI11          | BD11      | O11  |       |
| 9          | 12      | f      | BI9           | BD9       | O9   | H9    |
| 2          | 12      | m      | BI2           | BD2       | O2   |       |
| 19         | 13      | m      | BI19          | BD19      | O19  |       |
| 15         | 14      | f      | BI15          | BD15      |      |       |
| 18         | 17      | f      | BI18          | BD18      | O18  |       |
| 31         | 17      | m      |               |           |      | H31   |
| 29         | 18      | m      |               | BD29      |      |       |
| 49         | 19      | m      | BI49          | BD49      | O49  | H49   |
| 51         | 19      | m      | BI51          | BD51      | O51  |       |
| 5          | 20      | m      | BI5           |           | O5   | H5    |
| 50         | 22      | m      | BI50          | BD50      | O50  | H50   |
| 22         | 23      | f      | BI22          | BD22      | O22  |       |
| 36         | 23      | m      |               |           |      | H36   |
| 26         | 30      | m      |               |           |      | H26   |
| 25         | 35      | f      | BI25          | BD25      | O25  |       |
| 4          | 36      | m      | BI4           | BD4       | O4   |       |
| 48         | 37      | m      |               |           |      | H48   |
| 41         | 39      | m      |               |           |      | H41   |
| 8          | 40      | m      | BI8           | BD8       | O8   |       |
| 10         | 40      | m      | BI10          | BD10      | O10  |       |
| 12         | 45      | f      | BI12          | BD12      | O12  |       |
| 16         | 45      | f      | BI16          | BD16      | O16  |       |
| 17         | 46      | m      | 2 BI17        | BD17      | O17  |       |
| 14         | 47      | f      | BI14          | BD14      | O14  |       |
| 13         | 48      | f      | BI13          | BD13      | O13  |       |
| 6          | 48      | m      | BI6           |           | O6   | H6    |
| 7          | 50      | m      | BI7           | BD7       | O7   |       |
| 54         | -       | -      | BI54          | BD54      | O54  |       |

**Table S2. Composition of Amerindian *E. coli* isolate genomic libraries.**

|                                                     | <b>Subject IDs</b>        | <b>Strain IDs*</b>                                                                             | <b>Library size (GB)</b> |
|-----------------------------------------------------|---------------------------|------------------------------------------------------------------------------------------------|--------------------------|
| <b>Library A</b>                                    | 3, 5, 6, 23               | 15, 24, 30, 31, 55, 56, 122, 145, 188, 212, 217, 264, 293, 392, 393, 399, 402, 848, 849        | 4.50 – 4.95              |
| <b>Library B</b>                                    | 9, 25, 31, 36, 48, 49, 50 | 335, 373, 378, 383, 408, 428, 429, 431, 451, 453, 478, 482, 502, 507, 525, 533, 564, 656, 1057 | 9.04                     |
| *Equal amounts of DNA were pooled from each isolate |                           |                                                                                                |                          |

**Table S3. Functional capture of antibiotic resistance genes from Amerindian *E. coli* isolate genomic libraries.**

| <b>Antibiotic</b>        | <b>Library A <sup>†</sup></b> | <b>Library B <sup>†</sup></b> |
|--------------------------|-------------------------------|-------------------------------|
| Penicillin               | ARG                           | ARG                           |
| Piperacillin*            | ARG                           | ARG                           |
| Piperacillin-tazobactam* | ARG                           | ARG                           |
| Cefotaxime*              | NO-ARG                        | NO-ARG                        |
| Ceftazidime              | ARG                           | ARG                           |
| Cefepime*                | NO-ARG                        | NO-ARG                        |
| Meropenem*               | NO-ARG                        | NO-ARG                        |
| Aztreonam*               | ARG                           | ARG                           |
| Chloramphenicol          | ARG                           | ARG                           |
| Tetracycline*            | ARG                           | ARG                           |
| Tigecycline              | ARG                           | ARG                           |
| Gentamicin*              | NO-ARG                        | NO-ARG                        |
| Ciprofloxacin*           | NO-ARG                        | NO-ARG                        |
| Colistin                 | NO-ARG                        | NO-ARG                        |

ARG = Resistance (*i.e.*, growth on selection plates in the absence of growth on negative control plates) was observed by functional screening of genomic library on corresponding antibiotic  
NO-ARG = No resistance was observed by functional screening of genomic library on corresponding antibiotic  
\* All Amerindian *E. coli* isolates were screened for phenotypic resistance against these antibiotics, and were found to be susceptible in all cases.  
<sup>†</sup> The composition of each library is defined in Table S2.

**Table S4. Antibiotic resistance genes identified from functional selections of Amerindian *E. coli* isolate genomic libraries and Amerindian and Puerto Rican metagenomic libraries**

| Origin | Subject | Site  | Contig           | Accession | Gene coordinates | Antibiotic | Class                                              | MG1655 gene | Length (bp) | Top hit by blastx to NCBI nr           | %ID        | Top hit accession |
|--------|---------|-------|------------------|-----------|------------------|------------|----------------------------------------------------|-------------|-------------|----------------------------------------|------------|-------------------|
| AE     | A       | Fecal | Library A_PE_9   | KJ910913  | 2948-4114        | PE         | $\beta$ -lactamase, Class C, <i>ampC</i>           | <i>ampC</i> | 1167        | <i>Escherichia coli</i> *              | 98.7       | 446841495         |
| AE     | B       | Fecal | Library B_PE_6   | KJ910933  | 2782-3948        | PE         | $\beta$ -lactamase, Class C, <i>ampC</i>           | <i>ampC</i> | 1167        | <i>Escherichia coli</i> *              | 99.2       | 446841455         |
| AE     | A       | Fecal | Library A_PI_1   | KJ910915  | 445-1611         | PI         | $\beta$ -lactamase, Class C, <i>ampC</i>           | <i>ampC</i> | 1167        | <i>Escherichia coli</i> *              | 99.2       | 446841495         |
| AE     | B       | Fecal | Library B_PI_8   | KJ910938  | 3221-3490        | PI         | $\beta$ -lactamase                                 | <i>ampC</i> | 270         | <i>Escherichia coli</i> *              | 98.9       | 485961087         |
| AE     | B       | Fecal | Library B_PI_8   | KJ910938  | 3465-4388        | PI         | $\beta$ -lactamase, Class C, <i>ampC</i>           | <i>ampC</i> | 924         | <i>Escherichia coli</i> *              | 99         | 446841495         |
| AE     | B       | Fecal | Library B_PI_10  | KJ910936  | 2960-3229        | PI         | $\beta$ -lactamase                                 | <i>ampC</i> | 270         | <i>Escherichia coli</i> *              | 98.9       | 485961087         |
| AE     | B       | Fecal | Library B_PI_10  | KJ910936  | 3204-4127        | PI         | $\beta$ -lactamase, Class C, <i>ampC</i>           | <i>ampC</i> | 924         | <i>Escherichia coli</i> *              | 99         | 446841495         |
| AE     | A       | Fecal | Library A_PITZ_1 | KJ910914  | 1989-2996        | PITZ       | $\beta$ -lactamase, Class C, <i>ampC</i>           | <i>ampC</i> | 1008        | <i>Escherichia coli</i> *              | 99.7       | 485706785         |
| AE     | B       | Fecal | Library B_PITZ_8 | KJ910934  | 1924-3090        | PITZ       | $\beta$ -lactamase, Class C, <i>ampC</i>           | <i>ampC</i> | 1167        | <i>Escherichia coli</i> *              | 99.5       | 446841455         |
| AE     | A       | Fecal | Library A_CZ_1   | KJ910910  | 22-1188          | CZ         | $\beta$ -lactamase, Class C, <i>ampC</i>           | <i>ampC</i> | 1167        | <i>Escherichia coli</i> *              | 100        | 446841447         |
| AE     | B       | Fecal | Library B_CZ_1   | KJ910932  | 78-1244          | CZ         | $\beta$ -lactamase, Class C, <i>ampC</i>           | <i>ampC</i> | 1167        | <i>Escherichia coli</i> *              | 99.5       | 446841447         |
| AE     | A       | Fecal | Library A_AZ_1   | KJ910904  | 54-860           | AZ         | $\beta$ -lactamase                                 | <i>ampC</i> | 807         | <i>Escherichia coli</i> *              | 99.6       | 446841448         |
| AE     | A       | Fecal | Library A_AZ_1   | KJ910904  | 847-1221         | AZ         | $\beta$ -lactamase                                 | <i>ampC</i> | 375         | <i>Escherichia coli</i> *              | 100        | 485961087         |
| AE     | B       | Fecal | Library B_AZ_1   | KJ910926  | 161-1294         | AZ         | $\beta$ -lactamase, Class C, <i>ampC</i>           | <i>ampC</i> | 1134        | <i>Escherichia coli</i> *              | 100        | 485828396         |
| AE     | A       | Fecal | Library A_CH_10  | KJ910905  | 2957-4189        | CH         | MFS transporter                                    | <i>mdfA</i> | 1233        | MULTISPECIES: Enterobacteriaceae       | 99.8 - 100 | 669336572         |
| AE     | B       | Fecal | Library B_CH_4   | KJ910931  | 3012-4244        | CH         | MFS transporter                                    | <i>mdfA</i> | 1233        | <i>Escherichia coli</i> ISC7           | 99.5       | 571185026         |
| AE     | A       | Fecal | Library A_TE_12  | KJ910916  | 70-606           | TE         | MFS transporter <i>bcr/cflA</i>                    | <i>bcr</i>  | 537         | <i>Shigella sonnei</i> *               | 100        | 491278665         |
| AE     | A       | Fecal | Library A_TE_12  | KJ910916  | 623-1279         | TE         | MFS transporter <i>bcr/cflA</i>                    | <i>bcr</i>  | 657         | <i>Escherichia coli</i> *              | 99.5       | 559165244         |
| AE     | A       | Fecal | Library A_TE_7   | KJ910920  | 469-2250         | TE         | ABC transporter                                    | <i>mdlB</i> | 1782        | <i>Escherichia coli</i> *              | 99.5       | 487358840         |
| AE     | A       | Fecal | Library A_TE_7   | KJ910920  | 2243-4015        | TE         | ABC transporter                                    | <i>mdlA</i> | 1773        | <i>Escherichia coli</i> 2-222-05_S1_C1 | 99.7       | 652048337         |
| AE     | A       | Fecal | Library A_CH_4   | KJ910907  | 935-1324         | CH         | AraC family transcriptional regulator, <i>marA</i> | <i>marA</i> | 390         | MULTISPECIES: Enterobacteriaceae*      | 100        | 445942659         |
| AE     | B       | Fecal | Library B_CH_10  | KJ910927  | 2188-2577        | CH         | AraC family transcriptional regulator, <i>marA</i> | <i>marA</i> | 390         | MULTISPECIES: Enterobacteriaceae*      | 100        | 445942659         |
| AE     | A       | Fecal | Library A_PE_6   | KJ910912  | 3-308            | PE         | AraC family transcriptional regulator              | <i>marA</i> | 306         | MULTISPECIES: Enterobacteriaceae*      | 100        | 445942659         |
| AE     | A       | Fecal | Library A_TE_4   | KJ910917  | 1049-1438        | TE         | AraC family                                        | <i>marA</i> | 390         | MULTISPECIES:                          | 99.2       | 445942659         |

|    |   |       |                 |          |           |    |                                                       |      |     |                                   |      |           |
|----|---|-------|-----------------|----------|-----------|----|-------------------------------------------------------|------|-----|-----------------------------------|------|-----------|
|    |   |       |                 |          |           |    | transcriptional regulator,<br><i>marA</i>             |      |     | Enterobacteriaceae*               |      |           |
| AE | B | Fecal | Library B_TE_7  | KJ910941 | 1067-1456 | TE | AraC family transcriptional regulator                 | marA | 390 | MULTISPECIES: Enterobacteriaceae* | 96.9 | 445942659 |
| AE | A | Fecal | Library A_TE_8  | KJ910921 | 553-936   | TE | AraC family transcriptional regulator,<br><i>marA</i> | marA | 384 | MULTISPECIES: Enterobacteriaceae* | 99.2 | 445942659 |
| AE | A | Fecal | Library A_TG_10 | KJ910922 | 1093-1482 | TG | AraC family transcriptional regulator,<br><i>marA</i> | marA | 390 | MULTISPECIES: Enterobacteriaceae* | 99.2 | 445942659 |
| AE | A | Fecal | Library A_CH_3  | KJ910906 | 3520-4389 | CH | AraC family transcriptional regulator                 | rob  | 870 | MULTISPECIES: Enterobacteriaceae* | 100  | 446293811 |
| AE | B | Fecal | Library B_CH_20 | KJ910930 | 157-1026  | CH | AraC family transcriptional regulator                 | rob  | 870 | MULTISPECIES: Enterobacteriaceae* | 100  | 446293811 |
| AE | A | Fecal | Library A_PE_2  | KJ910911 | 631-1500  | PE | AraC family transcriptional regulator                 | rob  | 870 | MULTISPECIES: Enterobacteriaceae* | 100  | 446293811 |
| AE | A | Fecal | Library A_TE_6  | KJ910919 | 2033-2902 | TE | AraC family transcriptional regulator                 | rob  | 870 | MULTISPECIES: Enterobacteriaceae* | 100  | 446293811 |
| AE | B | Fecal | Library B_TE_1  | KJ910939 | 1855-2724 | TE | AraC family transcriptional regulator                 | rob  | 870 | MULTISPECIES: Enterobacteriaceae* | 100  | 446293811 |
| AE | A | Fecal | Library A_TG_6  | KP063058 | 2116-2985 | TG | AraC family transcriptional regulator                 | rob  | 870 | MULTISPECIES: Enterobacteriaceae* | 99.7 | 446293811 |
| AE | A | Fecal | Library A_CH_6  | KJ910908 | 476-799   | CH | AraC family transcriptional regulator                 | soxS | 324 | MULTISPECIES: Enterobacteriaceae* | 100  | 445941503 |
| AE | B | Fecal | Library B_CH_17 | KJ910929 | 139-462   | CH | AraC family transcriptional regulator                 | soxS | 324 | <i>Escherichia coli</i>           | 99.1 | 585364975 |
| AE | A | Fecal | Library A_TE_5  | KJ910918 | 3-299     | TE | AraC family transcriptional regulator                 | soxS | 297 | <i>Escherichia coli</i>           | 100  | 585364975 |
| AE | B | Fecal | Library B_TE_6  | KJ910940 | 1-198     | TE | AraC family transcriptional regulator                 | soxS | 198 | <i>Shigella dysenteriae</i> *     | 100  | 445941496 |
| AE | A | Fecal | Library A_TG_1  | KJ910923 | 2763-3086 | TG | AraC family transcriptional regulator                 | soxS | 324 | <i>Escherichia coli</i>           | 99.1 | 585364975 |
| AE | A | Fecal | Library A_TG_4  | KJ910924 | 515-838   | TG | AraC family transcriptional regulator                 | soxS | 324 | MULTISPECIES: Enterobacteriaceae* | 99.1 | 445941503 |
| AE | A | Fecal | Library A_CH_8  | KJ910909 | 1691-2029 | CH | AraC family                                           | n/a  | 339 | <i>Escherichia coli</i>           | 99.1 | 607731705 |

|    |    |       |                  |          |           |      |                                                   |     |      |                                                 |      |           |
|----|----|-------|------------------|----------|-----------|------|---------------------------------------------------|-----|------|-------------------------------------------------|------|-----------|
|    |    |       |                  |          |           |      | transcriptional regulator                         |     |      | O121:H7 str. 2009C-3299                         |      |           |
| AE | B  | Fecal | Library B_CH_15  | KJ910928 | 4-387     | CH   | AraC family transcriptional regulator             | n/a | 384  | <i>Escherichia coli</i> O121:H7 str. 2009C-3299 | 91.5 | 607731705 |
| AE | B  | Fecal | Library B_PI_1   | KJ910937 | 3-560     | PI   | AraC family transcriptional regulator             | n/a | 558  | <i>Escherichia coli</i> *                       | 100  | 446161253 |
| AE | B  | Fecal | Library B_PITZ_9 | KJ910935 | 1-690     | PITZ | AraC family transcriptional regulator             | n/a | 690  | <i>Escherichia coli</i> *                       | 100  | 446161253 |
| AE | A  | Fecal | Library A_TG_8   | KJ910925 | 1-564     | TG   | AraC family transcriptional regulator             | n/a | 564  | <i>Escherichia coli</i> *                       | 99.5 | 446161253 |
| AM | 5  | Fecal | F5_PITZ_3        | KJ910968 | 33-794    | PITZ | AraC family transcriptional regulator             | -   | 762  | <i>Escherichia coli</i> *                       | 100  | 445982640 |
| AM | 6  | Fecal | F6_PI_27         | KJ910949 | 1276-2184 | PI   | $\beta$ -lactamase, Class A, subclass <i>cblA</i> | -   | 909  | <i>Bacteroides stercorisoris</i>                | 95   | 647550201 |
| AM | 6  | Fecal | F6_CT_1          | KJ910947 | 1200-2108 | CT   | $\beta$ -lactamase, Class A, subclass <i>cblA</i> | -   | 909  | <i>Bacteroides stercorisoris</i>                | 95.7 | 647550201 |
| AM | 6  | Fecal | F6_CZ_1          | KJ910948 | 1330-2238 | CZ   | $\beta$ -lactamase, Class A, subclass <i>cblA</i> | -   | 909  | <i>Bacteroides stercorisoris</i>                | 94.7 | 647550201 |
| AM | 6  | Fecal | F6_CP_1          | KJ910946 | 308-1216  | CP   | $\beta$ -lactamase, Class A, subclass <i>cblA</i> | -   | 909  | <i>Bacteroides stercorisoris</i>                | 95.7 | 647550201 |
| AM | 6  | Fecal | F6_AZ_9          | KJ910942 | 1352-2260 | AZ   | $\beta$ -lactamase, Class A, subclass <i>cblA</i> | -   | 909  | <i>Bacteroides stercorisoris</i>                | 95.7 | 647550201 |
| AM | 3  | Oral  | O3_CZ_2_1        | KJ910979 | 301-2049  | CZ   | Penicillin-binding protein                        | -   | 1749 | <i>Neisseria mucosa</i> *                       | 100  | 647544871 |
| AM | 3  | Oral  | O3_CZ_2_2        | KJ910980 | 301-2049  | CZ   | Penicillin-binding protein                        | -   | 1749 | <i>Neisseria mucosa</i> *                       | 99.8 | 647544871 |
| AM | 5  | Oral  | O5_CZ_1          | KJ910969 | 522-2270  | CZ   | Penicillin-binding protein                        | -   | 1749 | <i>Neisseria perflava</i>                       | 99.8 | 647544695 |
| AM | 5  | Oral  | O5_CZ_2          | KJ910970 | 3-746     | CZ   | Penicillin-binding protein                        | -   | 744  | <i>Neisseria mucosa</i>                         | 99.6 | 647544835 |
| AM | 5  | Oral  | O5_CZ_4          | KJ910971 | 287-2062  | CZ   | Penicillin-binding protein                        | -   | 1776 | <i>Kingella kingae</i>                          | 98   | 648255141 |
| AM | 23 | Oral  | O23_CZ_1         | KJ910977 | 121-1902  | CZ   | Penicillin-binding protein                        | -   | 1782 | <i>Kingella oralis</i> *                        | 80.8 | 489893834 |
| AM | 3  | Fecal | F3_CH_11         | KJ910965 | 1187-1852 | CH   | Chloramphenicol acetyltransferase                 | -   | 666  | uncultured bacterium DCM009Cm07                 | 61.1 | 602249281 |
| AM | 5  | Fecal | F5_CH_2          | KJ910967 | 271-807   | CH   | Chloramphenicol acetyltransferase                 | -   | 537  | <i>Clostridium</i> sp. CAG:226*                 | 96.6 | 514417560 |
| AM | 6  | Fecal | F6_CH_2          | KJ910943 | 1345-1971 | CH   | Chloramphenicol acetyltransferase                 | -   | 627  | <i>Aeromonas salmonicida</i> *                  | 99.5 | 500229267 |
| AM | 6  | Fecal | F6_CH_2          | KJ910943 | 2946-3572 | CH   | Chloramphenicol                                   | -   | 627  | <i>Aeromonas</i>                                | 100  | 50022926  |

|    |    |       |            |          |           |      |                                          |   |      |                                                 |      |           |
|----|----|-------|------------|----------|-----------|------|------------------------------------------|---|------|-------------------------------------------------|------|-----------|
|    |    |       |            |          |           |      | acetyltransferase                        |   |      | <i>salmonicida</i> *                            |      | 7         |
| AM | 6  | Fecal | F6_CH_4    | KJ910944 | 174-1193  | CH   | Chloramphenicol acetyltransferase        | - | 1020 | uncultured bacterium DCM009Cm07                 | 61.1 | 602249281 |
| AM | 6  | Fecal | F6_CH_5    | KJ910945 | 198-752   | CH   | Chloramphenicol acetyltransferase        | - | 555  | <i>Prevotella copri</i> *                       | 90.4 | 493900592 |
| AM | 23 | Fecal | F23_CH_11  | KJ910951 | 1298-1636 | CH   | AraC family transcriptional regulator    | - | 339  | <i>Escherichia coli</i> O121:H7 str. 2009C-3299 | 99.1 | 607731705 |
| AM | 23 | Oral  | O23_CH_21  | KJ910976 | 997-1638  | CH   | Chloramphenicol acetyltransferase        | - | 642  | MULTISPECIES: Gammaproteobacteria*              | 100  | 500075340 |
| AM | 23 | Oral  | O23_CH_19  | KJ910975 | 550-804   | CH   | Unknown                                  | - | 255  | <i>Neisseria bacilliformis</i> *                | 61.3 | 494574895 |
| AM | 3  | Fecal | F3_TE_1    | KJ910966 | 770-2674  | TE   | Ribosomal protection protein             | - | 1905 | [ <i>Clostridium</i> ] <i>saccharolyticum</i> * | 65.7 | 503038805 |
| AM | 6  | Fecal | F6_TE_1    | KJ910950 | 1651-3570 | TE   | Ribosomal protection protein             | - | 1920 | MULTISPECIES: Bacteria*                         | 99.8 | 488650015 |
| AM | 23 | Fecal | F23_TE_1   | KJ910953 | 69-1403   | TE   | MATE transporter                         | - | 1335 | <i>Phascolarctobacterium succinatutens</i> *    | 99.1 | 496436881 |
| AM | 3  | Oral  | O3_TE_1    | KJ910981 | 208-1638  | TE   | MFS transporter <i>emrB</i>              | - | 1431 | <i>Kingella denitrificans</i> *                 | 96.2 | 489877768 |
| AM | 5  | Oral  | O5_TE_1    | KJ910972 | 769-2208  | TE   | MFS transporter <i>emrB</i>              | - | 1440 | <i>Neisseria sicca</i> *                        | 95   | 489857717 |
| AM | 5  | Oral  | O5_TE_3    | KJ910973 | 2-703     | TE   | MFS transporter                          | - | 702  | <i>Kingella denitrificans</i> *                 | 97.3 | 489877768 |
| AM | 23 | Oral  | O23_TE_1   | KJ910978 | 1-1845    | TE   | ABC transporter                          | - | 1845 | <i>Cardiobacterium valvarum</i> *               | 97.1 | 494042102 |
| PR | 40 | Fecal | 220_PE_14  | KJ911003 | 3-656     | PE   | $\beta$ -lactamase                       | - | 654  | <i>Collimonas fungivorans</i> *                 | 37   | 503772503 |
| PR | 44 | Oral  | 238_PE_3   | KJ911002 | 446-805   | PE   | $\beta$ -lactamase, Class A              | - | 360  | <i>Escherichia coli</i> *                       | 98.3 | 487678966 |
| PR | 44 | Oral  | 238_PE_3   | KJ911002 | 777-1223  | PE   | $\beta$ -lactamase, Class A              | - | 447  | <i>Klebsiella pneumoniae</i>                    | 99.3 | 344222647 |
| PR | 62 | Oral  | 337_PE_1   | KJ910989 | 390-1307  | PE   | $\beta$ -lactamase, Class A              | - | 918  | MULTISPECIES: Pasteurellaceae*                  | 99   | 491823213 |
| PR | 62 | Oral  | 337_PI_2   | KJ910996 | 201-1118  | PI   | $\beta$ -lactamase, Class A              | - | 918  | MULTISPECIES: Pasteurellaceae*                  | 99   | 491823213 |
| PR | 62 | Oral  | 337_PITZ_2 | KJ910995 | 282-1199  | PITZ | $\beta$ -lactamase, Class A              | - | 918  | MULTISPECIES: Pasteurellaceae*                  | 99.3 | 491823213 |
| PR | 62 | Oral  | 337_CZ_1   | KJ910983 | 703-1620  | CZ   | $\beta$ -lactamase, Class A              | - | 918  | MULTISPECIES: Pasteurellaceae*                  | 100  | 491823213 |
| PR | 62 | Oral  | 337_PE_13  | KJ910985 | 5065-5652 | PE   | $\beta$ -lactamase, Class B, subclass B3 | - | 588  | uncultured bacterium                            | 99.5 | 636669846 |
| PR | 62 | Oral  | 337_PE_15  | KJ910987 | 116-1045  | PE   | $\beta$ -lactamase, Class B, subclass B3 | - | 930  | uncultured bacterium                            | 100  | 636669846 |
| PR | 62 | Oral  | 337_PE_16  | KJ910988 | 1046-1969 | PE   | $\beta$ -lactamase, Class B, subclass B3 | - | 924  | uncultured bacterium                            | 99.7 | 636669325 |
| PR | 62 | Oral  | 337_PE_24  | KJ910991 | 837-1709  | PE   | $\beta$ -lactamase,                      | - | 873  | uncultured bacterium*                           | 100  | 63666984  |



|    |      |       |              |          |           |      |                                               |   |      |                                          |             |           |
|----|------|-------|--------------|----------|-----------|------|-----------------------------------------------|---|------|------------------------------------------|-------------|-----------|
|    |      |       |              |          |           |      | Class B, subclass B3                          |   |      |                                          |             | 2         |
| PR | 62   | Oral  | 337_PE_30    | KJ910992 | 3280-3897 | PE   | $\beta$ -lactamase, Class B, subclass B3      | - | 618  | uncultured bacterium                     | 98.5        | 636669508 |
| PR | 62   | Oral  | 337_PE_34    | KJ910993 | 562-1008  | PE   | $\beta$ -lactamase, Class B, subclass B3      | - | 447  | uncultured bacterium                     | 91.3        | 636669343 |
| PR | 62   | Oral  | 337_PE_11    | KJ910984 | 464-1354  | PE   | $\beta$ -lactamase, Class B, subclass B3, BJP | - | 891  | uncultured bacterium                     | 100         | 636669512 |
| PR | 62   | Oral  | 337_PE_14    | KJ910986 | 712-1602  | PE   | $\beta$ -lactamase, Class B, subclass B3, BJP | - | 891  | uncultured bacterium                     | 99.3        | 636669830 |
| PR | 62   | Oral  | 337_PE_34    | KJ910993 | 1005-1445 | PE   | $\beta$ -lactamase, Class B, subclass B3, BJP | - | 441  | uncultured bacterium                     | 100         | 636669343 |
| PR | 62   | Oral  | 337_PE_3     | KJ910994 | 1205-2056 | PE   | $\beta$ -lactamase, Class B, subclass B1, SPM | - | 852  | uncultured bacterium                     | 99.3        | 636669520 |
| PR | 62   | Oral  | 337_PE_13    | KJ910985 | 4244-4666 | PE   | Penicillin-binding protein                    | - | 423  | uncultured bacterium                     | 98.6        | 636669835 |
| PR | T100 | Oral  | T1001_PITZ_7 | KJ910963 | 2-862     | PITZ | $\beta$ -lactamase                            | - | 861  | <i>Ktedonobacter racemifer</i> *         | 46.4        | 495198521 |
| PR | T100 | Oral  | T1001_CZ_5   | KJ910961 | 1-1212    | CZ   | $\beta$ -lactamase                            | - | 1212 | <i>Methanosarcinamazei</i> *             | 38.3        | 499345516 |
| PR | T100 | Oral  | T1001_PITZ_5 | KJ910962 | 66-1814   | PITZ | Penicillin-binding protein                    | - | 1749 | <i>Neisseria macacae</i> *               | 100         | 489872691 |
| PR | T100 | Oral  | T1001_CZ_11  | KJ910959 | 1532-3334 | CZ   | Penicillin-binding protein                    | - | 1803 | <i>Neisseria macacae</i> *               | 99.6        | 489872691 |
| PR | 62   | Oral  | 337_CH_1     | KJ910982 | 349-1578  | CH   | MFS transporter                               | - | 1230 | <i>Acinetobacter lwoffii</i>             | 98.8        | 498013474 |
| PR | 40   | Fecal | 220_TE_2     | KJ911006 | 6-1925    | TE   | Ribosomal protection protein                  | - | 1920 | MULTISPECIES: Firmicutes**               | 99.7 - 99.8 | 649571947 |
| PR | 40   | Fecal | 220_TE_6     | KJ911008 | 118-2043  | TE   | Ribosomal protection protein                  | - | 1926 | MULTISPECIES: Prevotella*                | 100         | 490505649 |
| PR | 40   | Fecal | 220_TE_1     | KJ911005 | 74-1234   | TE   | TetX                                          | - | 1161 | MULTISPECIES: Bacteroidales**            | 99.2        | 598867507 |
| PR | 44   | Fecal | 242_TE_1     | KJ911009 | 523-1683  | TE   | TetX                                          | - | 1161 | <i>Bacteroides fragilis</i> str. S23L17* | 99.5        | 598867507 |
| PR | 44   | Fecal | 242_TG_2     | KJ911011 | 209-1369  | TG   | TetX                                          | - | 1161 | MULTISPECIES: Bacteroidales*             | 99.7        | 495926503 |
| PR | 62   | Fecal | 341_TE_1     | KJ911000 | 202-2121  | TE   | Ribosomal protection protein                  | - | 1920 | MULTISPECIES: Bacteria**                 | 99.8 - 100  | 356668633 |
| PR | 62   | Fecal | 341_TE_2     | KJ911001 | 837-1877  | TE   | Ribosomal protection protein                  | - | 1041 | MULTISPECIES: Bacteria**                 | 98.8 - 100  | 446614390 |
| PR | T100 | Fecal | T1003_TE_12  | KJ910954 | 588-1748  | TE   | TetX                                          | - | 1161 | <i>Bacteroides fragilis</i> *            | 99.7        | 492232865 |
| PR | T100 | Fecal | T1003_TG_1   | KJ910958 | 1021-2181 | TG   | TetX                                          | - | 1161 | <i>Bacteroides fragilis</i> *            | 99.7        | 492232865 |

|                                                                                                                                                                                                                                                                                                                                                                                                                                                                                                                                                                                                                                                                                                                                                                                           |      |      |            |          |          |    |                                    |   |      |                            |      |           |
|-------------------------------------------------------------------------------------------------------------------------------------------------------------------------------------------------------------------------------------------------------------------------------------------------------------------------------------------------------------------------------------------------------------------------------------------------------------------------------------------------------------------------------------------------------------------------------------------------------------------------------------------------------------------------------------------------------------------------------------------------------------------------------------------|------|------|------------|----------|----------|----|------------------------------------|---|------|----------------------------|------|-----------|
| PR                                                                                                                                                                                                                                                                                                                                                                                                                                                                                                                                                                                                                                                                                                                                                                                        | 62   | Oral | 337_TE_6   | KJ910999 | 2-1678   | TE | ABC transporter                    | - | 1677 | <i>Neisseria cinerea</i> * | 99.8 | 489773067 |
| PR                                                                                                                                                                                                                                                                                                                                                                                                                                                                                                                                                                                                                                                                                                                                                                                        | 62   | Oral | 337_TE_2   | KJ910997 | 82-1290  | TE | MFS transporter<br><i>bcr/cflA</i> | - | 1209 | <i>Neisseria cinerea</i> * | 98.5 | 489772787 |
| PR                                                                                                                                                                                                                                                                                                                                                                                                                                                                                                                                                                                                                                                                                                                                                                                        | 62   | Oral | 337_TE_4   | KJ910998 | 156-1589 | TE | MFS transporter<br><i>emrB</i>     | - | 1434 | <i>Neisseria sicca</i> *   | 98.7 | 489863199 |
| PR                                                                                                                                                                                                                                                                                                                                                                                                                                                                                                                                                                                                                                                                                                                                                                                        | T100 | Oral | T1001_TE_1 | KJ910964 | 166-2085 | TE | Ribosomal<br>protection protein    | - | 1920 | MULTISPECIES:<br>Bacteria* | 100  | 446614412 |
| <p>AE: Amerindian <i>E. coli</i> isolate, AM: Amerindian microbiota, PR: Puerto Rican microbiota. A and B are libraries created from the pooled genomic DNA of Amerindian <i>E. coli</i> isolates (Table S2). PE: penicillin, PI: piperacillin, PIZ: piperacillin-tazobactam, CT: cefotaxime, CZ: ceftazidime, CP: cefepime, AZ: aztreonam, CH: chloramphenicol, TE: tetracycline, TG: tigecycline. 'MG1655 gene' was identified through alignment to Escherichia coli str. K-12 substr. MG1655; all alignments <math>\geq</math> 96% nucleotide ID. Investigated for <i>E. coli</i> isolate libraries only.</p> <p>* The top hit comprises multiple accessions, and only the first is listed.</p> <p>**The gene aligned equally well to multiple accessions, and only one is listed.</p> |      |      |            |          |          |    |                                    |   |      |                            |      |           |

**Table S5. Composition of metagenomic libraries from Amerindian and Puerto Rican fecal and oral microbiota.**

| <b>Origin</b> | <b>Individual</b> | <b>Sex</b> | <b>Age</b> | <b>Site</b> | <b>ID</b> | <b>Library size (GB)</b> |
|---------------|-------------------|------------|------------|-------------|-----------|--------------------------|
| Amerindian    | 3                 | M          | 11         | Fecal       | F3        | 7.15                     |
|               |                   |            |            | Oral        | O3        | 7.48                     |
| Amerindian    | 5                 | M          | 20         | Fecal       | F5        | 0.80                     |
|               |                   |            |            | Oral        | O5        | 8.69                     |
| Amerindian    | 6                 | M          | 48         | Fecal       | F6        | 4.80                     |
|               |                   |            |            | Oral        | O6        | 0.49                     |
| Amerindian    | 23                | F          | 7          | Fecal       | F23       | 3.19                     |
|               |                   |            |            | Oral        | O23       | 3.00                     |
| Puerto Rican  | 40                | M          | 9          | Fecal       | 220       | 1.08                     |
| Puerto Rican  | 62                | M          | 13         | Oral        | 337       | 4.09                     |
|               |                   |            |            | Fecal       | 341       | 5.77                     |
| Puerto Rican  | 70                | M          | 20         | Oral        | 381       | 1.41                     |
| Puerto Rican  | T100              | M          | 45         | Oral        | T100-1    | 8.51                     |
|               |                   |            |            | Fecal       | T100-3    | 4.32                     |
| Puerto Rican  | 44                | F          | 7          | Oral        | 238       | 1.75                     |
|               |                   |            |            | Fecal       | 242       | 6.44                     |

**Table S6. Antibiotics used in genomic and metagenomic library selections for antibiotic resistance genes.**

| <b>Cellular target</b> | <b>Antibiotic</b>       | <b>Abbreviation</b> | <b>Source</b>  | <b>Concentration (ug/mL)</b> |
|------------------------|-------------------------|---------------------|----------------|------------------------------|
| Cell wall synthesis    | Penicillin              | PE                  | Natural        | 128                          |
|                        | Piperacillin            | PI                  | Semi-synthetic | 16                           |
|                        | Piperacillin-tazobactam | PITZ                | Semi-synthetic | 16/4                         |
|                        | Cefotaxime              | CT                  | Semi-synthetic | 8                            |
|                        | Ceftazidime             | CZ                  | Semi-synthetic | 16                           |
|                        | Cefepime                | CP                  | Semi-synthetic | 8                            |
|                        | Meropenem               | ME                  | Semi-synthetic | 16                           |
|                        | Aztreonam               | AZ                  | Synthetic      | 8                            |
| Protein synthesis      | Chloramphenicol         | CH                  | Natural        | 8                            |
|                        | Tetracycline            | TE                  | Natural        | 8                            |
|                        | Tigecycline             | TG                  | Semi-synthetic | 2                            |
|                        | Gentamicin              | GE                  | Natural        | 16                           |
| DNA replication        | Ciprofloxacin           | CI                  | Synthetic      | 0.5                          |
| Cell membrane          | Colistin                | CL                  | Natural        | 8                            |
| Other                  | Nitrofurantoin          | NI                  | Synthetic      | 32                           |

Table S10. List of clusters at different k-mer and minimum contig length and their associated taxonomy.

| cluster | k-mer size | threshold length | taxonomy                                                                                                |
|---------|------------|------------------|---------------------------------------------------------------------------------------------------------|
| 0       | 55         | 100              | unidentified                                                                                            |
| 1       | 55         | 100              | unidentified                                                                                            |
| 2       | 55         | 100              | unidentified                                                                                            |
| 3       | 55         | 100              | unidentified                                                                                            |
| 4       | 55         | 100              | Mollicutes_bacterium<br>Fusobacterium_ulcerans                                                          |
| 5       | 55         | 100              | unidentified                                                                                            |
| 6       | 55         | 100              | unidentified                                                                                            |
| 7       | 55         | 100              | Candidatus_Pelagibacter_ubique_SAR11                                                                    |
| 8       | 55         | 100              | unidentified                                                                                            |
| 9       | 55         | 100              | Prevotella_sp._Oral_Taxon_472<br>Prevotella_ruminicola<br>Prevotella_copri<br>Prevotella_melaninogenica |
| 10      | 55         | 100              | Prevotella_pallens_Oral_Taxon_714<br>Prevotella_melaninogenica<br>Prevotella_denticola                  |
| 11      | 55         | 100              | unidentified                                                                                            |
| 12      | 55         | 100              | unidentified                                                                                            |
| 13      | 55         | 100              | Prevotella_copri                                                                                        |
| 14      | 55         | 100              | unidentified                                                                                            |
| 15      | 55         | 100              | unidentified                                                                                            |
| 16      | 55         | 100              | unidentified                                                                                            |
| 17      | 55         | 100              | unidentified                                                                                            |
| 18      | 55         | 100              | Beggiatoa_sp.                                                                                           |
| 19      | 55         | 100              | Mollicutes_bacterium                                                                                    |
| 20      | 55         | 100              | unidentified                                                                                            |
| 21      | 55         | 100              | Prevotella_denticola<br>Prevotella_melaninogenica                                                       |
| 22      | 55         | 100              | unidentified                                                                                            |
| 23      | 55         | 100              | Streptococcus_mitis                                                                                     |
| 24      | 55         | 100              | unidentified                                                                                            |
| cluster | k-mer size | threshold length | taxonomy                                                                                                |
| 0       | 59         | 100              | unidentified                                                                                            |
| 1       | 59         | 100              | Prevotella_melaninogenica<br>Prevotella_denticola<br>Prevotella_pallens_Oral_Taxon_714                  |
| 2       | 59         | 100              | Granulicatella_elegans                                                                                  |
| 3       | 59         | 100              | unidentified                                                                                            |
| 4       | 59         | 100              | unidentified                                                                                            |
| 5       | 59         | 100              | Streptococcus_sanguinis                                                                                 |

|    |    |     |                                        |
|----|----|-----|----------------------------------------|
|    |    |     | Streptococcus_oralis                   |
|    |    |     | Streptococcus_mitis                    |
|    |    |     | Streptococcus_sp.                      |
|    |    |     | Streptococcus_pneumoniae               |
|    |    |     | Veillonella_atypica                    |
| 6  | 59 | 100 | unidentified                           |
| 7  | 59 | 100 | unidentified                           |
| 8  | 59 | 100 | unidentified                           |
| 9  | 59 | 100 | unidentified                           |
| 10 | 59 | 100 | unidentified                           |
| 11 | 59 | 100 | unidentified                           |
| 12 | 59 | 100 | unidentified                           |
| 13 | 59 | 100 | unidentified                           |
| 14 | 59 | 100 | Prevotella_copri                       |
| 15 | 59 | 100 | Streptococcus_sanguinis                |
|    |    |     | Streptococcus_oralis                   |
|    |    |     | Streptococcus_sp.                      |
|    |    |     | Streptococcus_pneumoniae               |
|    |    |     | Streptococcus_infantis                 |
| 16 | 59 | 100 | unidentified                           |
| 17 | 59 | 100 | unidentified                           |
| 18 | 59 | 100 | Burkholderia_mallei                    |
| 19 | 59 | 100 | unidentified                           |
| 20 | 59 | 100 | unidentified                           |
| 21 | 59 | 100 | unidentified                           |
| 22 | 59 | 100 | Streptococcus_sanguinis                |
|    |    |     | Streptococcus_dysgalactiae_equisimilis |
|    |    |     | Streptococcus_sp.                      |
|    |    |     | Streptococcus_pneumoniae               |
|    |    |     | Streptococcus_infantis                 |
| 23 | 59 | 100 | unidentified                           |
| 24 | 59 | 100 | unidentified                           |
| 25 | 59 | 100 | Fusobacterium_ulcerans                 |
|    |    |     | Mollicutes_bacterium                   |
| 26 | 59 | 100 | unidentified                           |
| 27 | 59 | 100 | Streptococcus_mitis                    |

| cluster | k-mer size | threshold length | taxonomy                       |
|---------|------------|------------------|--------------------------------|
| 0       | 59         | 200              | Granulicatella_elegans         |
| 1       | 59         | 200              | unidentified                   |
| 2       | 59         | 200              | unidentified                   |
| 3       | 59         | 200              | Streptococcus_mitis            |
| 4       | 59         | 200              | Neisseria_elongata_glycolytica |

|    |    |                                |
|----|----|--------------------------------|
|    |    | Neisseria_mucosa               |
|    |    | Neisseria_subflava             |
|    |    | Neisseria_macacae              |
|    |    | Neisseria_sp._oral_taxon_014   |
|    |    | Neisseria_gonorrhoeae          |
|    |    | Neisseria_flavescens           |
| 5  | 59 | 200 unidentified               |
| 6  | 59 | 200 unidentified               |
| 7  | 59 | 200 unidentified               |
| 8  | 59 | 200 unidentified               |
| 9  | 59 | 200 Neisseria_lactamica        |
|    |    | Neisseria_elongata_glycolytica |
|    |    | Neisseria_sicca                |
|    |    | Neisseria_mucosa               |
|    |    | Neisseria_subflava             |
|    |    | Neisseria_macacae              |
|    |    | Neisseria_meningitidis         |
|    |    | Neisseria_sp._oral_taxon_014   |
|    |    | Neisseria_cinerea              |
|    |    | Neisseria_gonorrhoeae          |
|    |    | Neisseria_flavescens           |
| 10 | 59 | 200 Prevotella_copri           |
| 11 | 59 | 200 Neisseria_mucosa           |
| 12 | 59 | 200 Prevotella_marshii         |
|    |    | Prevotella_melaninogenica      |
|    |    | Bacteroides_xyloxydans         |
|    |    | Prevotella_ruminicola          |
|    |    | Chryseobacterium_gleum         |
|    |    | Zunongwangia_profunda          |
|    |    | Prevotella_sp._Oral_Taxon_472  |
|    |    | Bacteroides_intestinalis       |
|    |    | Bacteroides_uniformis          |
|    |    | Parabacteroides_johnsonii      |
|    |    | Bacteroides_cellulosilyticus   |
|    |    | Bacteroides_sp.                |
|    |    | Prevotella_buccalis            |
|    |    | Bacteroides_coprophilus        |
|    |    | Bacteroides_eggerthii          |
|    |    | Bacteroides_finegoldii         |
|    |    | Bacteroides_thetaiotaomicron   |
|    |    | Prevotella_buccae              |
|    |    | Alistipes_shahii               |

|         |            |                  | Prevotella_sp._Oral_Taxon_299             |
|---------|------------|------------------|-------------------------------------------|
|         |            |                  | Riemerella_anatipestife                   |
|         |            |                  | Flavobacteriacea_bacterium                |
|         |            |                  | Prevotella_timonensis                     |
|         |            |                  | Parabacteroides_sp.                       |
|         |            |                  | Bacteroides_stercoris                     |
|         |            |                  | Gramella_forsetii                         |
|         |            |                  | Bacteroides_dorei                         |
| 13      | 59         | 200              | unidentified                              |
| 14      | 59         | 200              | unidentified                              |
| 15      | 59         | 200              | unidentified                              |
| 16      | 59         | 200              | Fusobacterium_ulcerans                    |
|         |            |                  | Mollicutes_bacterium                      |
| 17      | 59         | 200              | unidentified                              |
| 18      | 59         | 200              | unidentified                              |
| 19      | 59         | 200              | Neisseria_sicca                           |
|         |            |                  | Neisseria_mucosa                          |
| 20      | 59         | 200              | unidentified                              |
| 21      | 59         | 200              | unidentified                              |
| 22      | 59         | 200              | Neisseria_meningitidis                    |
|         |            |                  | Neisseria_mucosa                          |
|         |            |                  | Kingella_denitrificans_Oral_Taxon_582     |
|         |            |                  | Neisseria_sicca                           |
|         |            |                  | Neisseria_elongata_glycolytica            |
| 23      | 59         | 200              | Lactobacillus_helveticus                  |
|         |            |                  | Streptococcus_sanguinis                   |
|         |            |                  | Streptococcus_gordonii                    |
|         |            |                  | Streptococcus_oralis                      |
|         |            |                  | Streptococcus_sp._Oral_Taxon_071          |
|         |            |                  | Streptococcus_parasanguinis               |
|         |            |                  | Streptococcus_sp.                         |
|         |            |                  | Streptococcus_salivarius                  |
|         |            |                  | Streptococcus_infantis                    |
| 24      | 59         | 200              | Streptococcus_sp.                         |
| 25      | 59         | 200              | Neisseria_mucosa                          |
| 26      | 59         | 200              | unidentified                              |
| cluster | k-mer size | threshold length | taxonomy                                  |
| 0       | 59         | 500              | Lysinibacillus_fusiformis                 |
|         |            |                  | Bacillus_thuringiensis                    |
|         |            |                  | Streptococcus_pyogenes                    |
|         |            |                  | Enterococcus_casseliflavus_Oral_Taxon_801 |
|         |            |                  | Lactobacillus_gasseri                     |



Streptococcus\_sp.  
Streptococcus\_uberis  
Lactobacillus\_coryniformis\_coryniformis  
Streptococcus\_mutans  
Lactobacillus\_fermentum  
Lactobacillus\_antri  
Staphylococcus\_capitis  
Streptococcus\_sanguinis  
Streptococcus\_pneumoniae  
Granulicatella\_adiacens  
Bacillus\_coahuilensis  
Granulicatella\_elegans  
Streptococcus\_equinus  
Bacillus\_amyloliquefaciens\_plantarum  
Enterococcus\_italicus\_Oral\_Taxon\_803  
Streptococcus\_oralis  
Lactobacillus\_farciminis  
Lactobacillus\_ruminis  
Streptococcus\_dysgalactiae\_equisimilis  
Streptococcus\_peroris\_Oral\_Taxon\_728  
Enterococcus\_faecium  
Eremococcus\_coleocola  
Leuconostoc\_mesenteroides\_cremoris  
Aerococcus\_viridans  
Staphylococcus\_aureus  
Lactobacillus\_coleohominis  
Streptococcus\_anginosus  
Enterococcus\_faecalis  
Lactobacillus\_iners  
Enterococcus\_gallinarum  
Listeria\_grayi  
Streptococcus\_sp.\_Oral\_Taxon\_07  
Streptococcus\_mitis  
Lactobacillus\_coryniformis\_torquens  
Staphylococcus\_epidermidis  
Lactobacillus\_amylolyticus  
Lactobacillus\_reuteri  
Lactobacillus\_fructivorans  
Weissella\_parmesenteroides  
Streptococcus\_thermophilus  
Anoxybacillus\_flavithermus  
Lactobacillus\_animalis

Streptococcus\_infantis  
 Streptococcus\_salivarius  
 Pediococcus\_acidilactici  
 Lactobacillus\_buchneri  
 Bacillus\_subtilis\_spizizenii  
 Streptococcus\_parasanguinis  
 Bacillus\_cereus  
 Lactococcus\_lactis\_lactis  
 Lactobacillus\_salivarius  
 Lactobacillus\_johnsonii  
 Lactobacillus\_acidophilus  
 Streptococcus\_gordonii  
 Streptococcus\_suis  
 Lactobacillus\_rhamnosus  
 Lactobacillus\_delbrueckii\_bulgaricus  
 Bacillus\_subtilis\_subtilis  
 Enterococcus\_casseliflavus  
 Gemmata\_obscuriglobus  
 Staphylococcus\_aureus\_aureus  
 Streptococcus\_australis  
 Lactobacillus\_paracasei

|   |    |     |                                                                                                                                                                  |
|---|----|-----|------------------------------------------------------------------------------------------------------------------------------------------------------------------|
| 1 | 59 | 500 | unidentified                                                                                                                                                     |
| 2 | 59 | 500 | Neisseria_mucosa<br>Neisseria_flavescens<br>Kingella_denitrificans_Oral_Taxon_582<br>Neisseria_sicca<br>Neisseria_elongata_glycolytica<br>Neisseria_meningitidis |

| cluster | k-mer size | threshold length | taxonomy                                                                                                                                                                                                                                                                                                                                         |
|---------|------------|------------------|--------------------------------------------------------------------------------------------------------------------------------------------------------------------------------------------------------------------------------------------------------------------------------------------------------------------------------------------------|
| 0       | 63         | 500              | unidentified                                                                                                                                                                                                                                                                                                                                     |
| 1       | 63         | 500              | Streptococcus_sp.<br>Streptococcus_mutans<br>Streptococcus_sanguinis<br>Streptococcus_pneumoniae<br>Streptococcus_equinus<br>Streptococcus_infantis<br>Streptococcus_salivarius<br>Streptococcus_oralis<br>Streptococcus_dysgalactiae_equisimilis<br>Streptococcus_peroris_Oral_Taxon_728<br>Lactococcus_lactis_lactis<br>Streptococcus_gordonii |

|         |            |                  | Streptococcus_anginosus                                                                                                                                                                                                                                                                                                                                                                                                                                                                                                                                                                                                                                                                                         |
|---------|------------|------------------|-----------------------------------------------------------------------------------------------------------------------------------------------------------------------------------------------------------------------------------------------------------------------------------------------------------------------------------------------------------------------------------------------------------------------------------------------------------------------------------------------------------------------------------------------------------------------------------------------------------------------------------------------------------------------------------------------------------------|
| 2       | 63         | 500              | unidentified                                                                                                                                                                                                                                                                                                                                                                                                                                                                                                                                                                                                                                                                                                    |
| 3       | 63         | 500              | unidentified                                                                                                                                                                                                                                                                                                                                                                                                                                                                                                                                                                                                                                                                                                    |
| 4       | 63         | 500              | Fusobacterium_nucleatum_vincentii<br>Fusobacterium_gonidiaformans<br>Fusobacterium_sp.                                                                                                                                                                                                                                                                                                                                                                                                                                                                                                                                                                                                                          |
| 5       | 63         | 500              | unidentified                                                                                                                                                                                                                                                                                                                                                                                                                                                                                                                                                                                                                                                                                                    |
| cluster | k-mer size | threshold length | taxonomy                                                                                                                                                                                                                                                                                                                                                                                                                                                                                                                                                                                                                                                                                                        |
| 0       | 67         | 500              | Prevotella_copri                                                                                                                                                                                                                                                                                                                                                                                                                                                                                                                                                                                                                                                                                                |
| 1       | 67         | 500              | Streptococcus_sanguinis<br>Granulicatella_elegans<br>Streptococcus_equinus<br>Streptococcus_oralis<br>Streptococcus_dysgalactiae_equisimilis<br>Streptococcus_peroris_Oral_Taxon_728<br>Enterococcus_faecium<br>Enterococcus_gallinarum<br>Streptococcus_mitis<br>Streptococcus_salivarius<br>Lactococcus_lactis_lactis<br>Streptococcus_australis<br>Streptococcus_pyogenes<br>Enterococcus_casseliflavus_Oral_Taxon_801<br>Streptococcus_sp.<br>Streptococcus_mutans<br>Streptococcus_pneumonia<br>Granulicatella_adiacens<br>Streptococcus_anginosus<br>Enterococcus_faecalis<br>Streptococcus_cristatus<br>Lactobacillus_animalis<br>Streptococcus_infantis<br>Streptococcus_gordonii<br>Streptococcus_suis |
| 2       | 67         | 500              | unidentified                                                                                                                                                                                                                                                                                                                                                                                                                                                                                                                                                                                                                                                                                                    |
| 3       | 67         | 500              | Fusobacterium_sp.<br>Fusobacterium_nucleatum_nucleatum<br>Fusobacterium_nucleatum_vincentii<br>Fusobacterium_gonidiaformans                                                                                                                                                                                                                                                                                                                                                                                                                                                                                                                                                                                     |
| 4       | 67         | 500              | unidentified                                                                                                                                                                                                                                                                                                                                                                                                                                                                                                                                                                                                                                                                                                    |
| 5       | 67         | 500              | unidentified                                                                                                                                                                                                                                                                                                                                                                                                                                                                                                                                                                                                                                                                                                    |

**Table S11. Taxa of 329 bacterial strains cultured from feces of 12 isolated Amerindians.**

| Phylum         | Order             | Genus                     | Species                 | Subjects | Isolates |
|----------------|-------------------|---------------------------|-------------------------|----------|----------|
| Actinobacteria | Actinomycetales   | <i>Arthrobacter</i>       | <i>sp</i> <sup>a</sup>  | 1        | 1        |
| Bacteroidetes  | Bacteroidales     | <i>Bacteroides</i>        | <i>dorei</i>            | 1        | 3        |
| Bacteroidetes  | Bacteroidales     | <i>Bacteroides</i>        | <i>eggerthii</i>        | 1        | 1        |
| Bacteroidetes  | Bacteroidales     | <i>Bacteroides</i>        | <i>ovatus</i>           | 2        | 2        |
| Bacteroidetes  | Bacteroidales     | <i>Porphyromonas</i>      | <i>sp</i> <sup>a</sup>  | 1        | 2        |
| Bacteroidetes  | Bacteroidales     | <i>Porphyromonas</i>      | <i>sp</i> <sup>a</sup>  | 1        | 1        |
| Bacteroidetes  | Bacteroidales     | <i>Prevotella</i>         | <i>sp</i> <sup>a</sup>  | 1        | 1        |
| Bacteroidetes  | Flavobacteria     | <i>Capnocytophaga</i>     | <i>ochracea</i>         | 1        | 1        |
| Bacteroidetes  | Flavobacteria     | <i>Capnocytophaga</i>     | <i>sp</i> <sup>a</sup>  | 1        | 2        |
| Bacteroidetes  | Flavobacteria     | <i>Capnocytophaga</i>     | <i>sputigena</i>        | 1        | 3        |
| Firmicutes     | Bacillales        | <i>Bacillus</i>           | <i>altitudinis</i>      | 1        | 1        |
| Firmicutes     | Bacillales        | <i>Bacillus</i>           | <i>sp</i> <sup>a</sup>  | 1        | 3        |
| Firmicutes     | Clostridiales     | <i>Clostridium</i>        | <i>clostridioforme</i>  | 5        | 8        |
| Firmicutes     | Clostridiales     | <i>Clostridium</i>        | <i>perfringens</i>      | 9        | 22       |
| Firmicutes     | Clostridiales     | <i>Clostridium</i>        | <i>sp</i> <sup>a</sup>  | 8        | 17       |
| Firmicutes     | Clostridiales     | <i>Peptostreptococcus</i> | <i>asaccharolyticus</i> | 3        | 4        |
| Firmicutes     | Clostridiales     | <i>Peptostreptococcus</i> | <i>sp</i> <sup>a</sup>  | 5        | 7        |
| Firmicutes     | Lactobacillales   | <i>Enterococcus</i>       | <i>durans</i>           | 2        | 3        |
| Firmicutes     | Lactobacillales   | <i>Enterococcus</i>       | <i>faecium</i>          | 1        | 1        |
| Firmicutes     | Lactobacillales   | <i>Enterococcus</i>       | <i>fecalis</i>          | 2        | 12       |
| Firmicutes     | Lactobacillales   | <i>Enterococcus</i>       | <i>hirae</i>            | 5        | 61       |
| Firmicutes     | Lactobacillales   | <i>Lactobacillus</i>      | <i>salivarius</i>       | 1        | 1        |
| Firmicutes     | Lactobacillales   | <i>Lactococcus</i>        | <i>garvieae</i>         | 6        | 29       |
| Fusobacteria   | Fusobacteriales   | <i>Fusobacterium</i>      | <i>sp</i> <sup>a</sup>  | 1        | 1        |
| Proteobacteria | Enterobacteriales | <i>Escherichia</i>        | <i>coli</i>             | 11       | 131      |
| Proteobacteria | Enterobacteriales | <i>Klebsiella</i>         | <i>pneumoniae</i>       | 3        | 10       |
| Proteobacteria | Neisseriales      | <i>Neisseria</i>          | <i>mucosa</i>           | 2        | 1        |

<sup>a</sup> Only defined to genus level

**Table S12. Typing of 24 *E. coli* strains from 11 isolated Amerindians**

| Host |     |        | # Strain | Sequence type | MLST Cluster | Clonal Complex | Closest Reference Strain*         | Reference strain host | Reference strain host species             |
|------|-----|--------|----------|---------------|--------------|----------------|-----------------------------------|-----------------------|-------------------------------------------|
| ID   | Age | Gender |          |               |              |                |                                   |                       |                                           |
| 23   | 7   | Female | 55       | 3314          | A            | 10             | Ecor16                            | Animal                | Captive leopard                           |
| 23   | 7   | Female | 56       | 3315          | A            | 10             | Ecor10 + Ecor2                    | Human                 | Human                                     |
| 23   | 7   | Female | 145      | 94            | B1           | 58             | Ecor45                            | Animal                | Domesticated pig                          |
| 23   | 7   | Female | 402      | 94            | B1           | 58             | Ecor45                            | Animal                | Domesticated pig                          |
| 3    | 11  | Male   | 212      | 3322          | B1           | 641            | Ecor69                            | Animal                | Captive celedes ape                       |
| 3    | 11  | Male   | 217      | 3316          | B1           | Singleton      | Ecor29                            | Animal                | Wild kangaroo rat                         |
| 3    | 11  | Male   | 264      | 3316          | B1           | Singleton      | Ecor29                            | Animal                | Wild kangaroo rat                         |
| 3    | 11  | Male   | 392      | 3411          | B1           | 641            | Ecor69                            | Animal                | Captive celedes ape                       |
| 3    | 11  | Male   | 848      | 3316          | B1           | Singleton      | Ecor29                            | Animal                | Wild kangaroo rat                         |
| 9    | 12  | Female | 373      | 94            | B1           | 58             | Ecor45                            | Animal                | Domesticated pig                          |
| 31   | 17  | Male   | 428      | 164           | B1           | Singleton      | Ecor34                            | Animal                | Domesticated dog                          |
| 31   | 17  | Male   | 429      | 3318          | A            | 361            | Various (Ecor18,19,20,21)         | Animal                | Captive celedes ape + Domesticated bovine |
| 5    | 20  | Male   | 24       | 3313          | A            | 10             | Ecor16                            | Animal                | Captive leopard                           |
| 5    | 20  | Male   | 31       | 871           | A            | 10             | Ecor16                            | Animal                | Captive leopard                           |
| 5    | 20  | Male   | 122      | 94            | B1           | 58             | Ecor45                            | Animal                | Domesticated pig                          |
| 5    | 20  | Male   | 393      | 46            | A            | 10             | Ecor16                            | Animal                | Captive leopard                           |
| 50   | 22  | Male   | 533      | 10            | A            | 10             | Various (Ecor14,12,11,1,9,8,5,25) | 7 Human + 1 Animal    | Human + Domesticated dog                  |
| 36   | 23  | Male   | 564      | 3415          | B1           | Singleton      | Ecor27                            | Animal                | Captive giraffe                           |
| 26   | 30  | Male   | 335      | 656           | A            | 10             | Ecor6                             | Human                 | Human                                     |
| 26   | 30  | Male   | 383      | 115           | D            | 115            | Ecor46                            | Animal                | Captive celedes ape                       |
| 26   | 30  | Male   | 507      | 3414          | B1           | 58             | Ecor45                            | Animal                | Domesticated pig                          |
| 48   | 37  | Male   | 502      | 3413          | B1           | 278            | Ecor27                            | Animal                | Captive giraffe                           |
| 6    | 48  | Male   | 293      | 3317          | A            | 10             | Ecor15                            | Human                 | Human                                     |
| 6    | 48  | Male   | 399      | 3412          | B1           | 278            | Ecor27                            | Animal                | Captive giraffe                           |

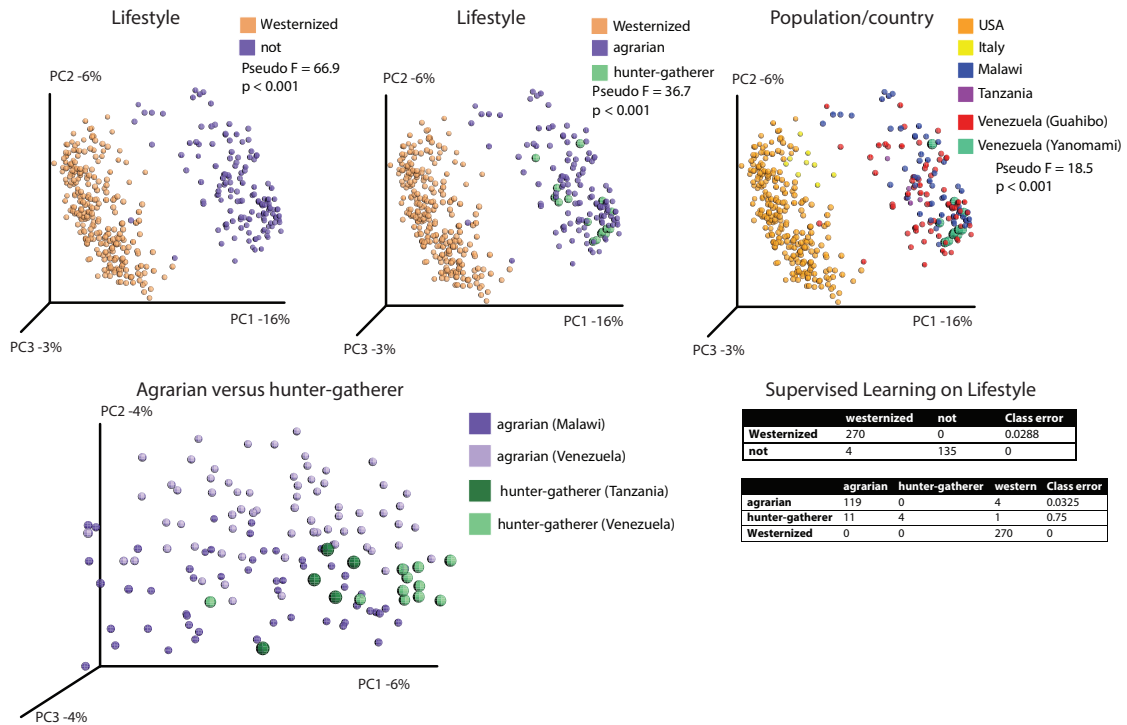

**Figure S1. Meta-analysis of 16S V4 region fecal data.** PCoA plots based on unweighted UniFrac distances colored by A) whether the population was Westernized or not, B) by subsistence mode, C) by country, and D) agrarian versus hunter-gatherer. D) Pseudo-F and p-values for permanova tests for each category in A-C. Rarefied at 1,000 seqs per sample. Data are from Schnorr *et al* (2014) and Yatsunenکو *et al* (2012). Lifestyle effect is much bigger than study effect (in PC2).

**A**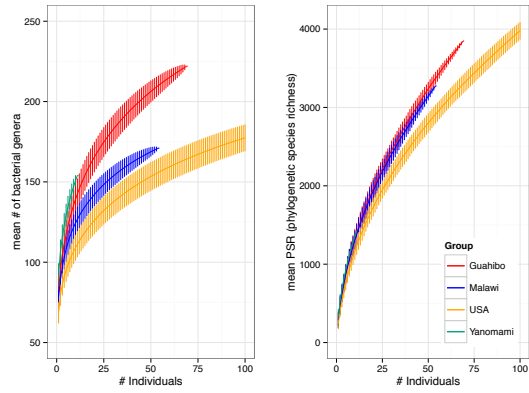**B**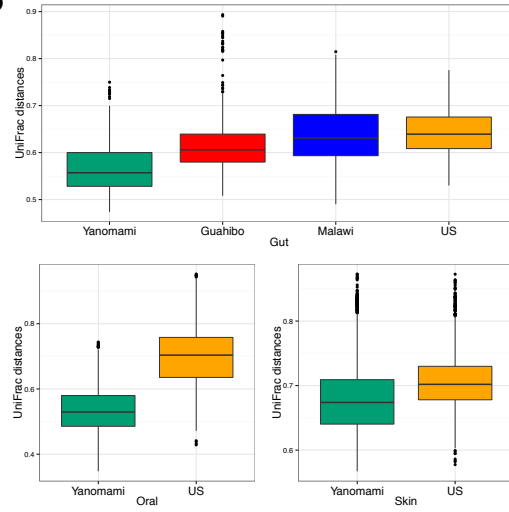**C**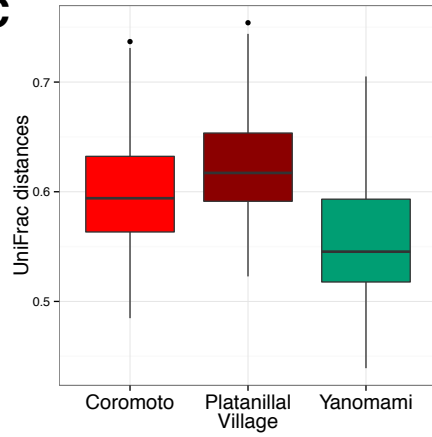**D**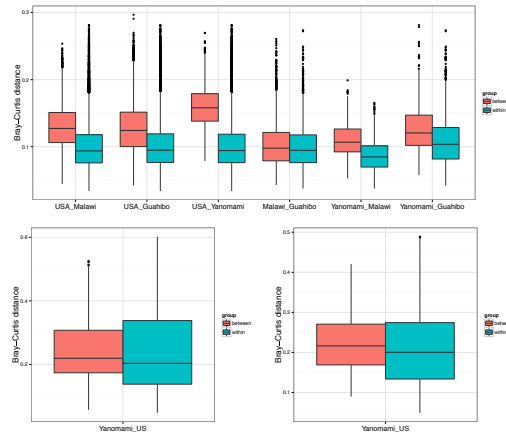**E**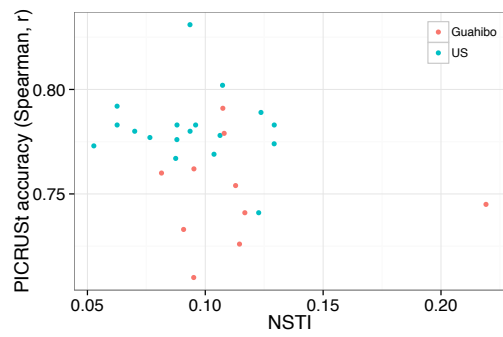**F**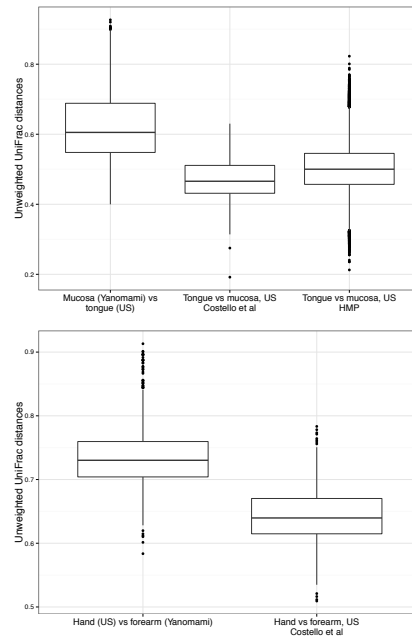

**Figure S2. Microbiome diversity between different human groups.**

**(A) Gamma diversity curves for fecal samples.** (Left) Mean number of bacterial genera as a function of number of samples. All differences significant (Welch's t-test with  $n = 10$  subjects, FDR corrected p-values) (Right) Mean phylogenetic species richness as a function of number of samples. Non-western (Yanomami, Guahibo, Malawians) versus US differences significant (Welch's t-test with  $n = 10$  subjects, FDR corrected p-values) **(B) Unweighted UniFrac distances within population and body site.** All differences were significant ( $p < 0.001$ , PERMANOVA with 999 permutations) **(C) Unweighted UniFrac distances of fecal microbiota within villages in two Amerindian populations.** Distances within samples from the uncontacted Yanomami village are significantly smaller than distances within either of the Guahibo villages, Coromoto and Platanillal ( $p < 0.001$ , PERMANOVA with 999 permutations) **(D) Within versus between Bray-Curtis distances between all pairs of populations with metagenomic data.** Separation between populations across body sites after randomly sub-sampling all populations to the same number of samples. Top: Fecal ( $p < 0.001$ , PERMANOVA with 999 permutations). Bottom, left: oral ( $p = 0.002$ , PERMANOVA with 999 permutations). Bottom, right: skin ( $p < 0.001$ , PERMANOVA with 999 permutations) **(E) Correlation between shotgun- and PICRUSt-predicted metagenomes in a US and Guahibo population.** Correlation measured as Spearman's  $r$  (vertical axis) versus mean closest reference genome measure as Nearest Sequenced Taxon Index (NSTI, horizontal axis). Mean NSTI of US subjects is not significantly lower than that of Guahibos ( $p = 0.1586$ , t-test), but Spearman's  $r$  is ( $p = 0.003$ , t-test) **(F) Unweighted UniFrac distances between microbiota in different sub-sites of the same body location.** (Top) Comparison between oral sub-sites. Left (this study): US oral mucosa vs Yanomami tongue; middle (Costello et al, Science 2009): US oral mucosa vs US tongue; right (HMP, Nature 2012): US oral mucosa vs US tongue. Differences between populations are larger than between sub-body sites ( $p < 0.001$ , PERMANOVA with 999 permutations) (Bottom) Comparison between cutaneous sub-sites. Left (this study): US hand vs Yanomami forearm; right (Costello et al, Science 2009): US hand vs US forearm. Differences between populations larger than between sub-sites ( $p < 0.001$ , PERMANOVA with 999 permutations)



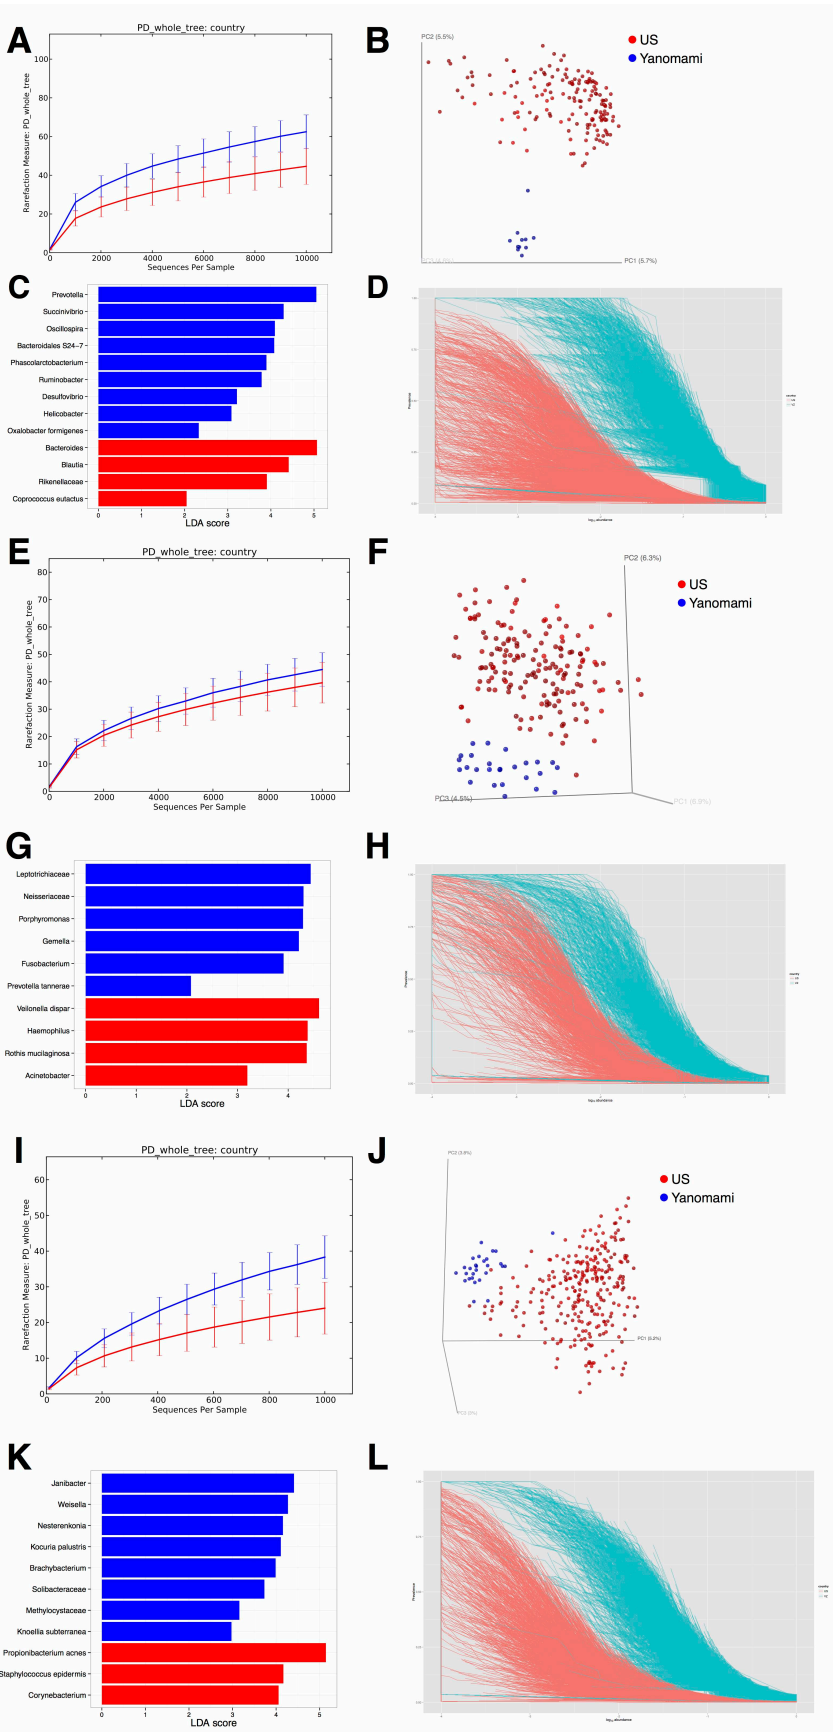

**Figure S3. Microbiota diversity in fecal, oral, and skin samples from uncontacted Yanomami in relation to US subjects using the V2 region of the 16S rRNA gene. (A)** Faith's phylogenetic diversity (average  $\pm$  standard deviation) of fecal samples from Yanomami and US subjects. OTU tables rarefied at 10,000 sequences/sample. Inter-population differences were significant ( $p < 1.23e-06$ , t-test) **(B)** PCoA plot based on UniFrac distances calculated on the OTU table of fecal samples rarefied at 10,000 sequences/sample. **(C)** Top discriminative bacteria among populations in fecal samples as determined by LEfSe analysis. **(D)** Normalized prevalence/abundance curves for all OTUs in fecal samples. **(E)** Faith's phylogenetic diversity (average  $\pm$  standard deviation) of oral samples from Yanomami and US subjects. OTU tables rarefied at 10,000 sequences/sample. Inter-population differences were significant ( $p = 0.0001$ , t-test). **(F)** PCoA plot based on UniFrac distances calculated on OTU tables of oral samples rarefied at 10,000 sequences/sample. **(G)** Top discriminative bacteria among populations in oral samples as determined by LEfSe analysis. **(H)** Normalized prevalence/abundance curves for all OTUs in oral samples. **(I)** Faith's phylogenetic diversity (average  $\pm$  standard deviation) of skin samples from Yanomami and US subjects. OTU tables rarefied at 1,000 sequences/sample. Inter-population differences were significant ( $p < 1.418e-13$ , t-test). **(J)** PCoA plot based on UniFrac distances calculated on OTU tables of skin samples rarefied at 1,000 sequences/sample. **(K)** Top discriminative bacteria among populations in skin samples as determined by LEfSe analysis. **(L)** Normalized prevalence/abundance curves for all OTUs in skin samples.

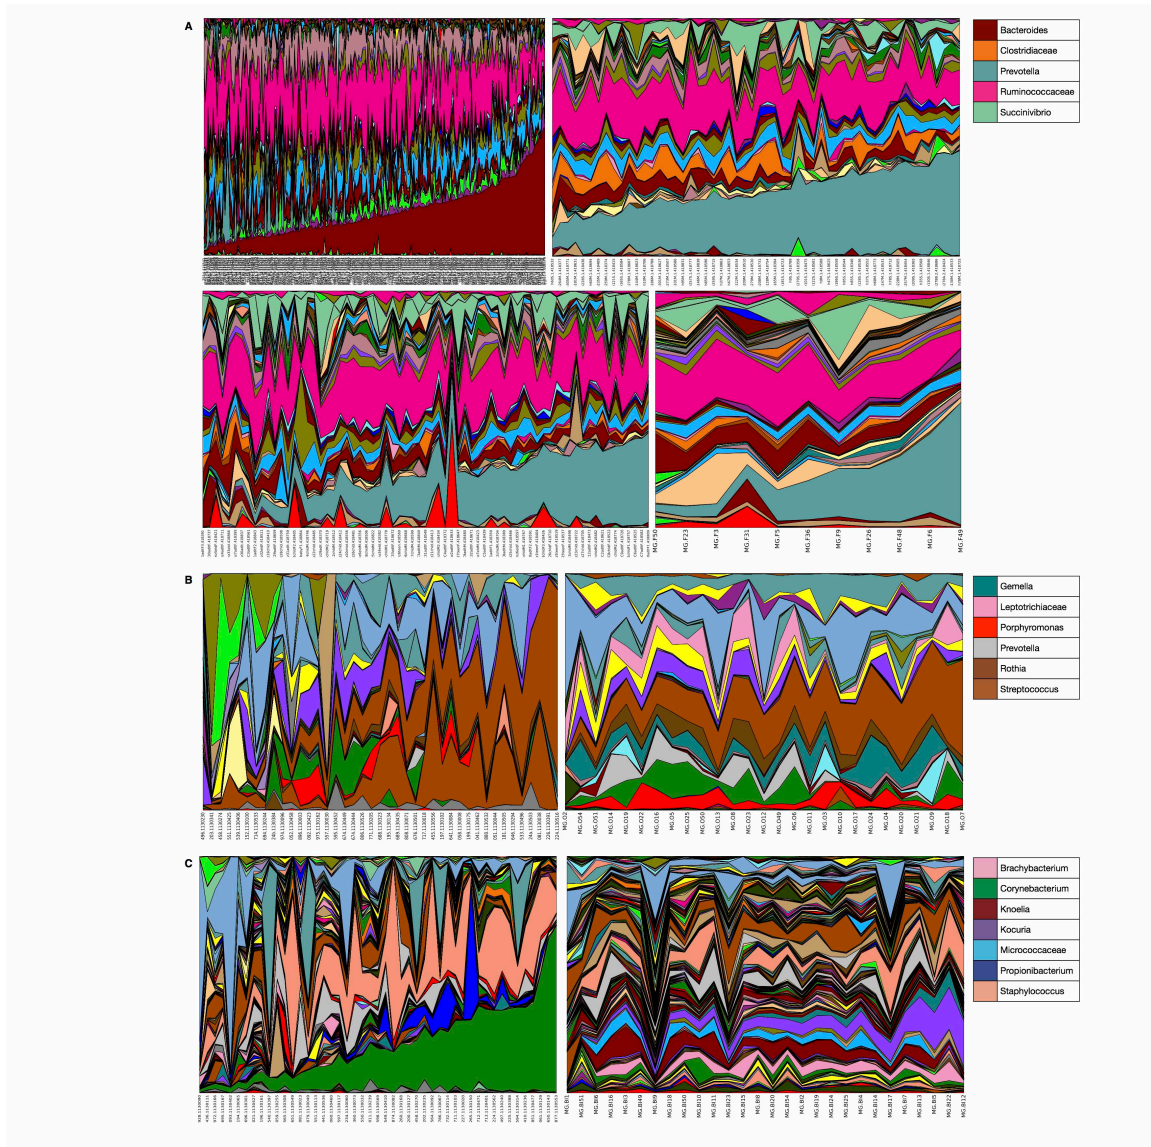

**Figure S4. Taxonomic distribution across gut samples sorted by the dominant genera within each population. (A)** From top to bottom, and left to right: Taxonomic abundance in fecal samples of US, dominated by *Bacteroides*; Malawi, Guahibo, and Yanomami, dominated by *Prevotella*. **(B)** Left to right: Taxonomic abundance in oral samples of US, dominated by *Streptococcus* and with significant abundance of *Rothia* and Yanomami, showing more even diversity. **(C)** Left to right: Taxonomic abundance in skin samples of US, dominated by *Corynebacterium*; Yanomami, showing more even diversity but also significant levels of *Kocuria*.

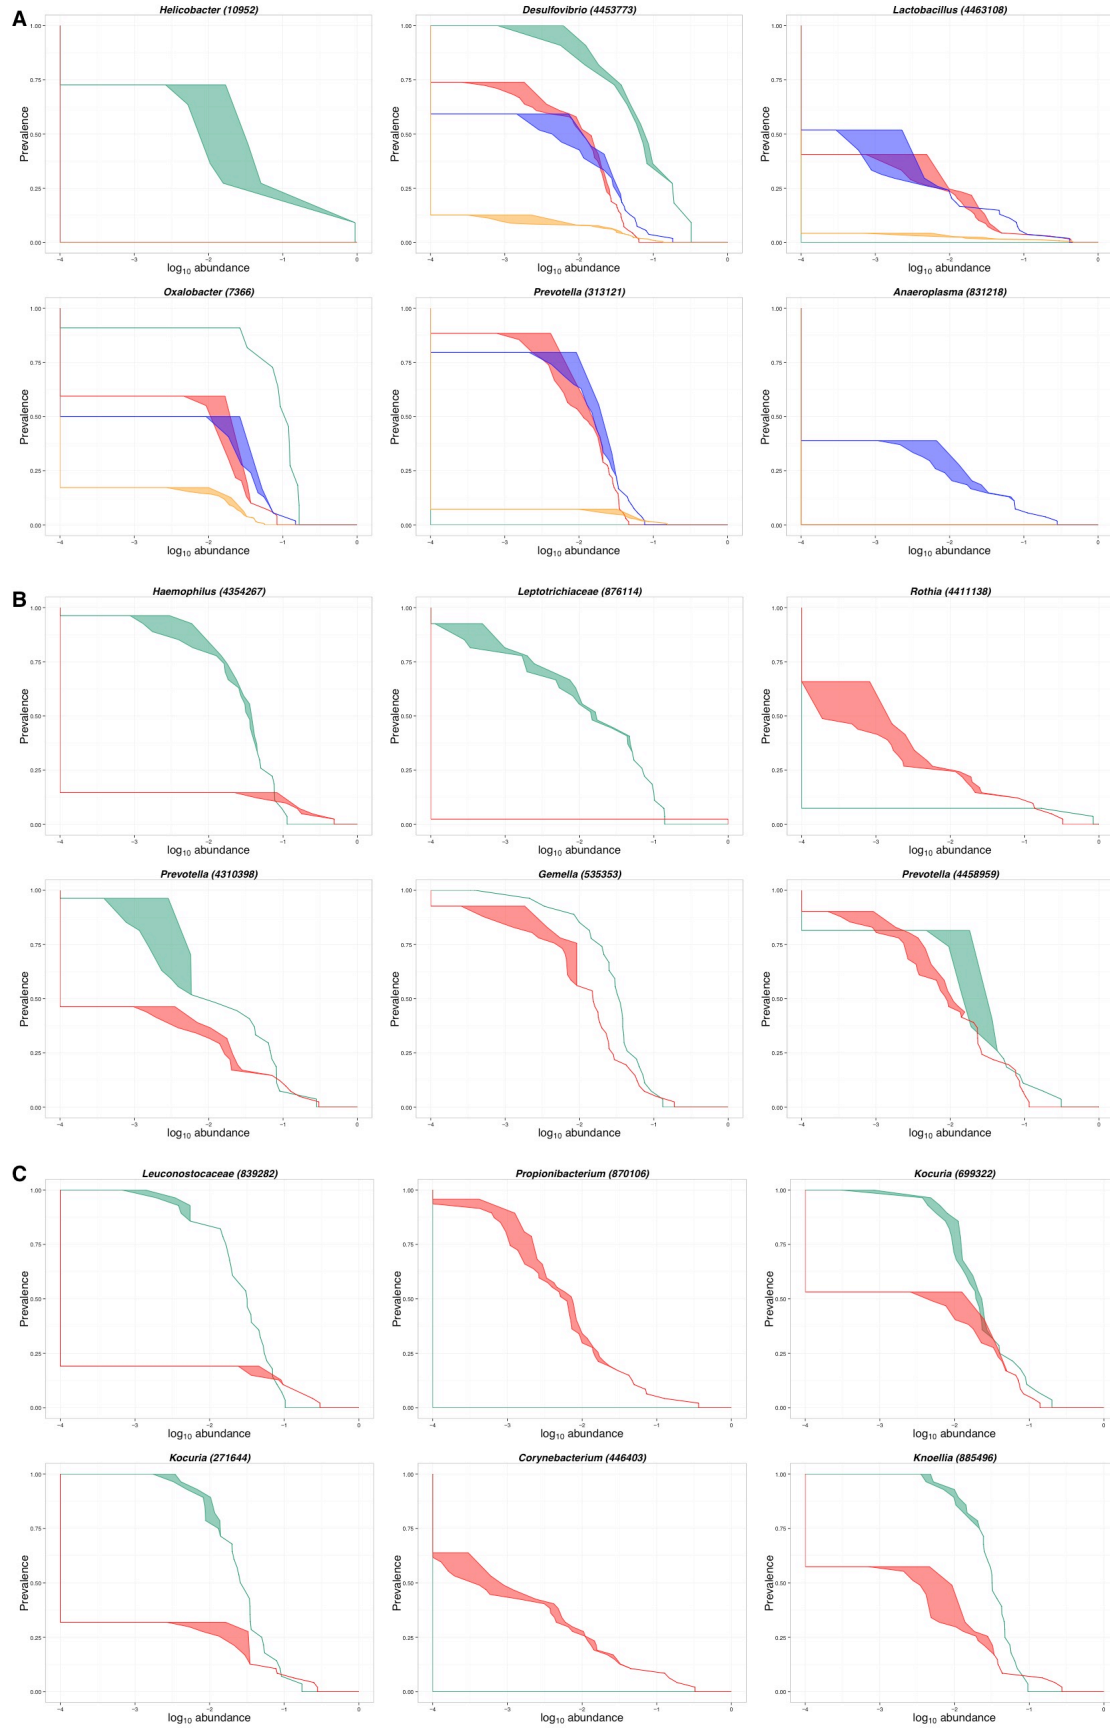



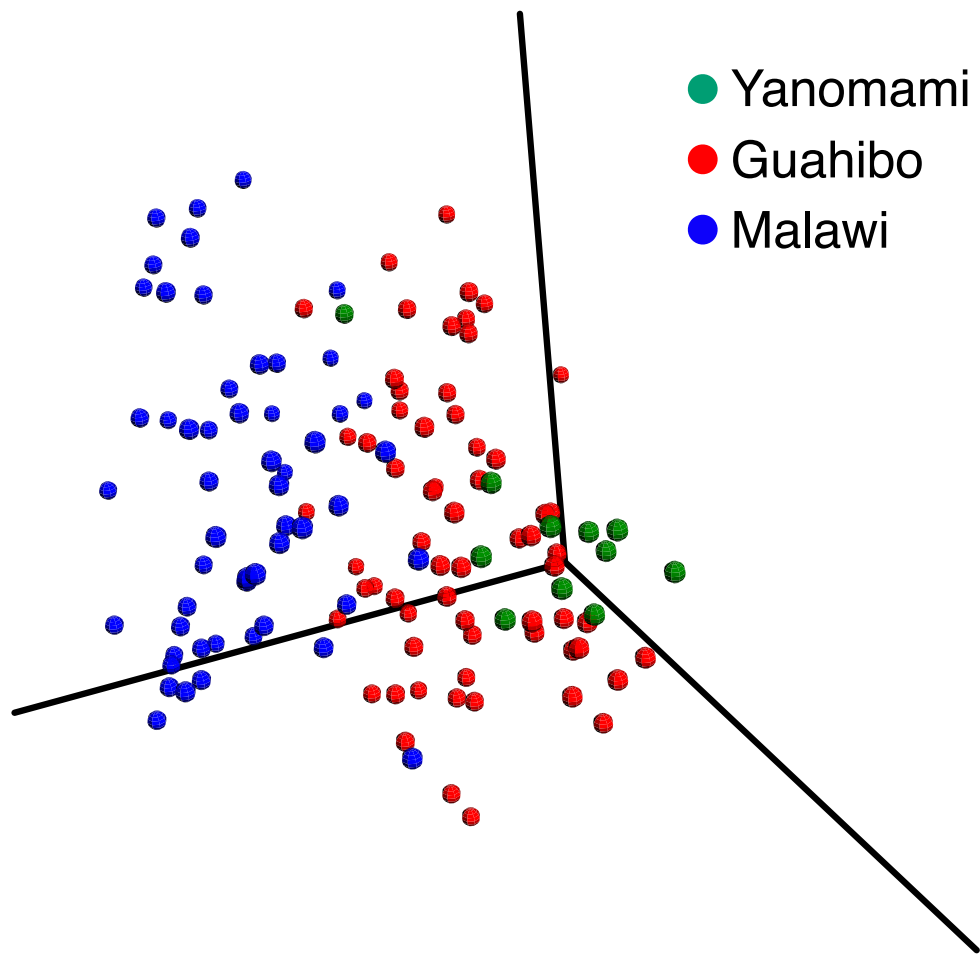

**Figure S7. PCoA plot of Yanomami, Malawian, and Guahibo fecal samples.** PCoA based on unweighted UniFrac distances on a table rarefied at 5,000 sequences per sample.

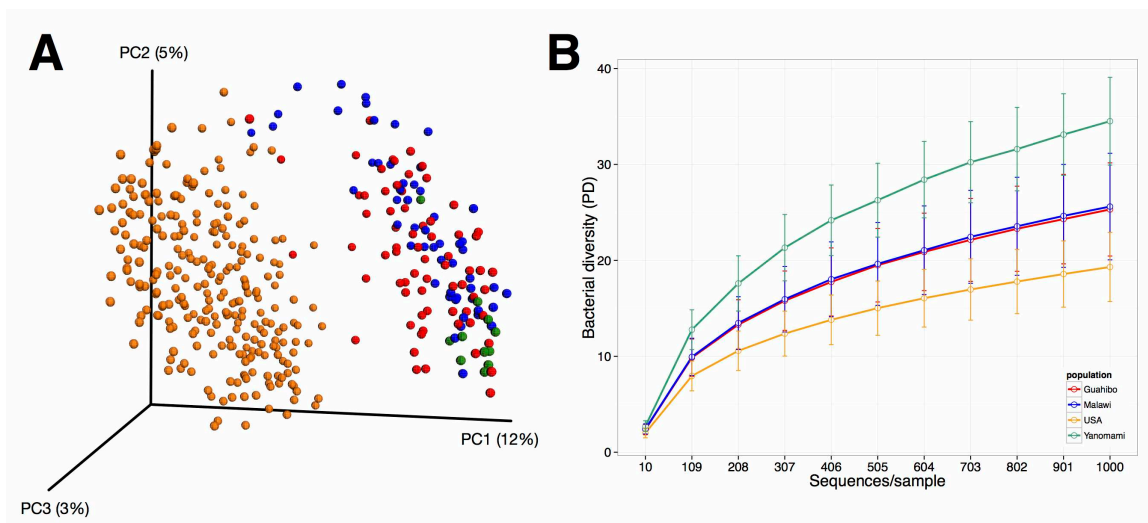



**Figure S8. Fecal microbiome of non-Bacteroides OTUs in Yanomami, Malawian, Guahibo, and US samples. (A) PCoA plot based on unweighted UniFrac distances on a table rarefied at 1,000 sequences per sample. (B) Faith's phylogenetic diversity (average  $\pm$  standard deviation) of oral samples from Yanomami and US subjects. OTU table rarefied at 1,000 sequences per sample.**

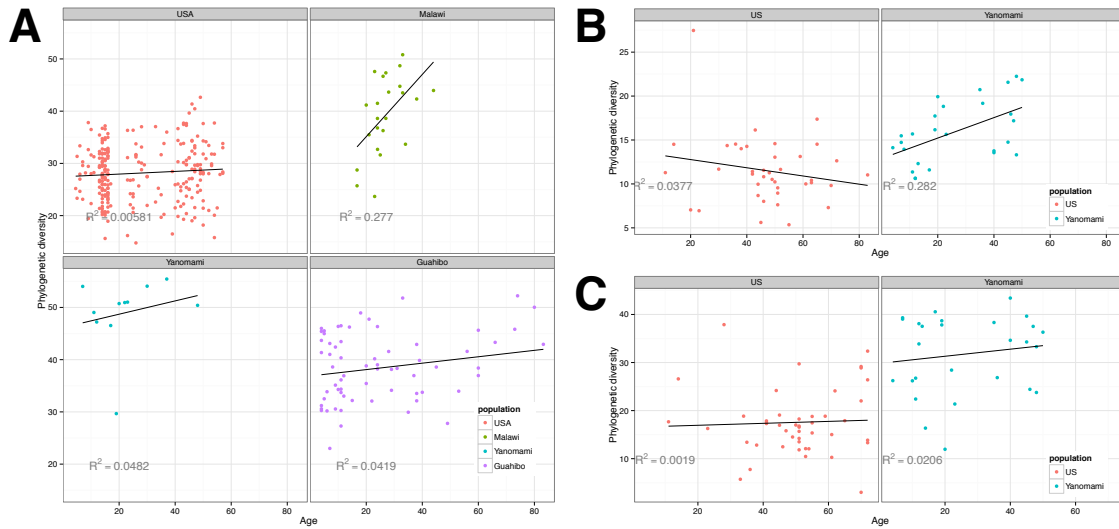

**Figure S9. Bacterial diversity as a function of age and body site. (A) Average Faith's phylogenetic diversity of fecal samples from US, Malawi, Yanomami, and Guahibo subjects plotted against age. Samples rarefied at 5,000 sequences/sample. (B) Average Faith's phylogenetic diversity of oral samples from US and Yanomami subjects plotted against age. Samples rarefied at 1,500 sequences/sample. (C) Average Faith's phylogenetic diversity of skin samples from US and Yanomami subjects plotted against age. Samples rarefied at 1,500 sequences/sample.**

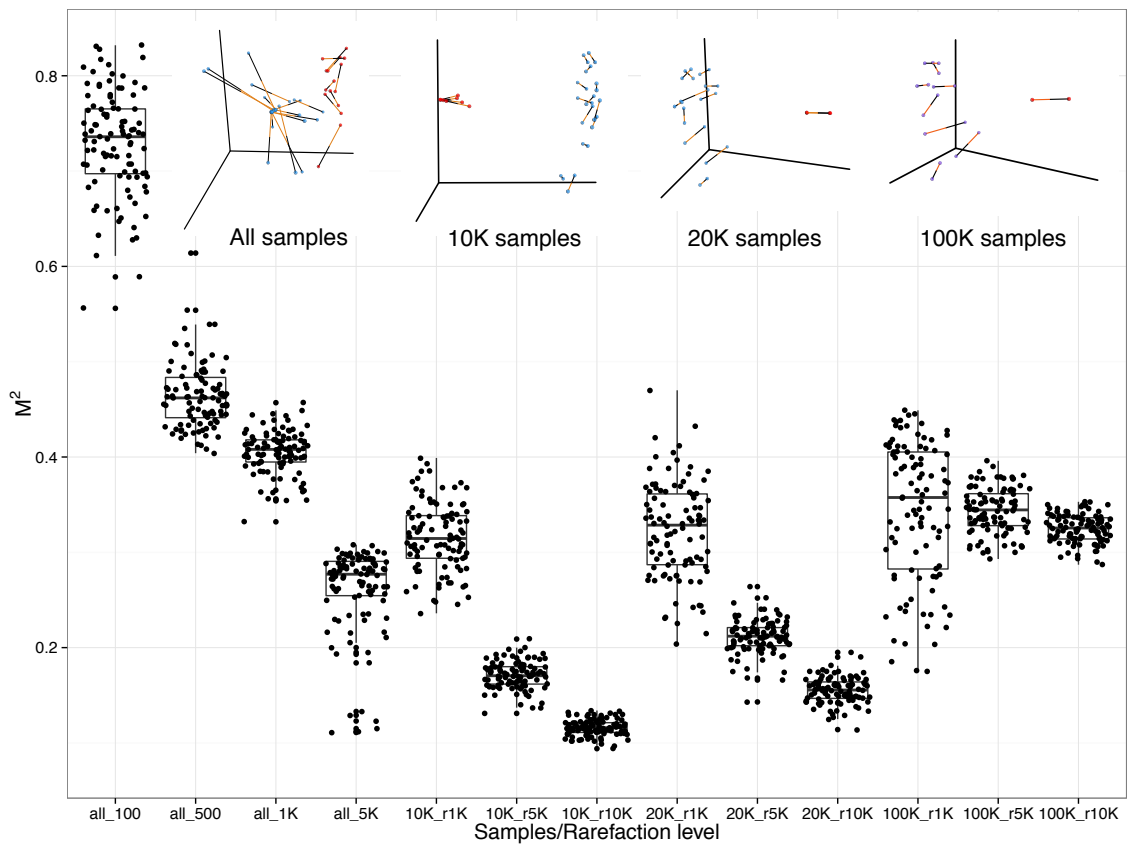

**Figure S10. Procrustes analyses of shotgun metagenomic and 16S rRNA data for different subsets of samples.** The vertical axis displays Procrustes  $M^2$  between shotgun and 16S rRNA data. The horizontal axis presents subsets of samples ('all' = all samples; '10K' = samples with at least 10,000 reads mapped to IMG genomes; '20K' = samples with at least 20,000 reads mapped; '100K' = samples with at least 100,000 reads mapped) and rarefaction cutoffs (e.g. 'all\_100' = all samples, rarefied at 100 seqs/sample; '10K\_5K' = samples with 10K mapped reads, rarefied at 5,000 seqs/sample). A representative Procrustes plot is shown on top for each subset of samples (all samples, samples with >10K mapped reads, samples with >20K mapped reads, samples with >100K mapped reads).



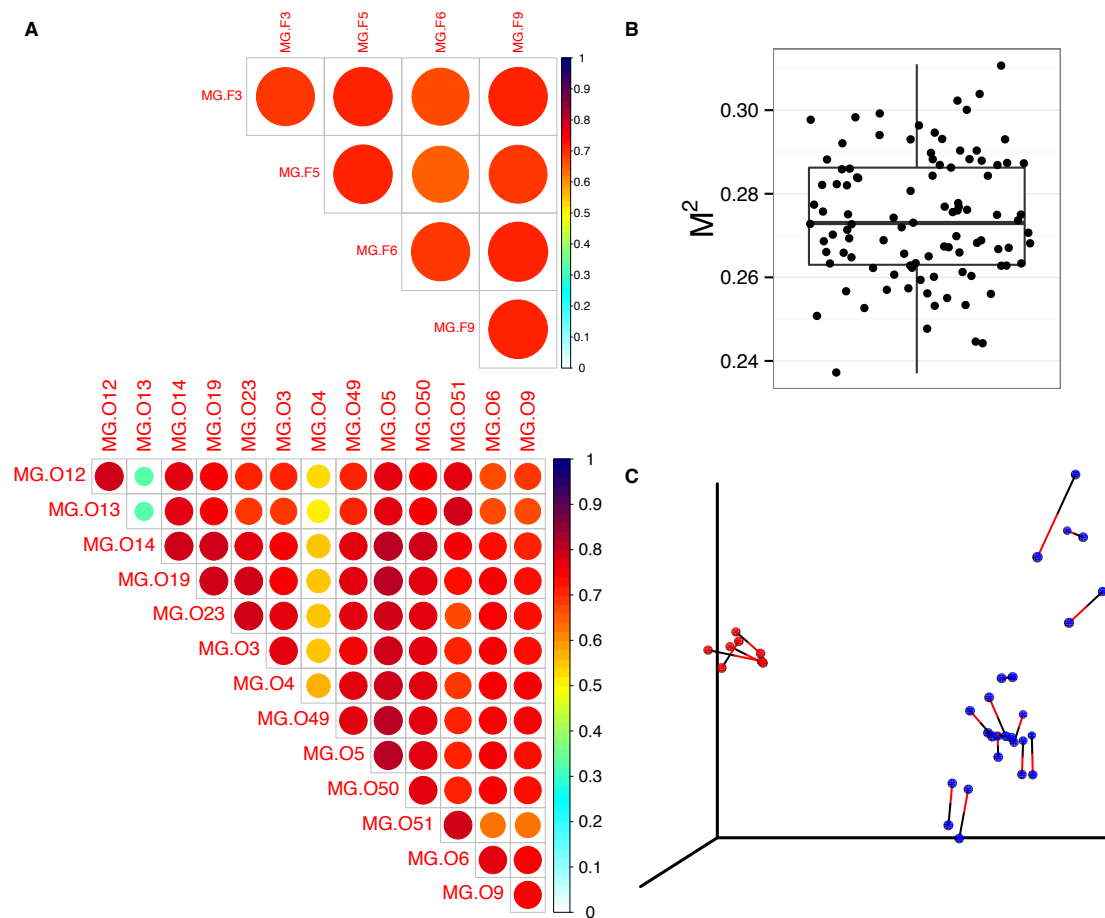

**Figure S11. Comparison of PICRUSt versus sequenced shotgun metagenomes of fecal and oral samples with at least 10,000 mapped reads. (A)** Pearson correlation coefficient between PICRUSt-predicted and sequenced metagenomes for each sample. Size and color of the circles indicate strength of the correlation. **(B)** Procrustes analysis between PICRUSt-predicted and sequenced metagenomes. 100 rarefied PICRUSt-predicted and shotgun sequenced metagenomes were compared using Procrustes. The  $M^2$  values of the comparisons, indicating goodness of fit (the lower the better), are presented ( $p < 0.01$ , Monte Carlo permutation test). **(C)** Representative Procrustes plot between PICRUSt and shotgun metagenomic tables.

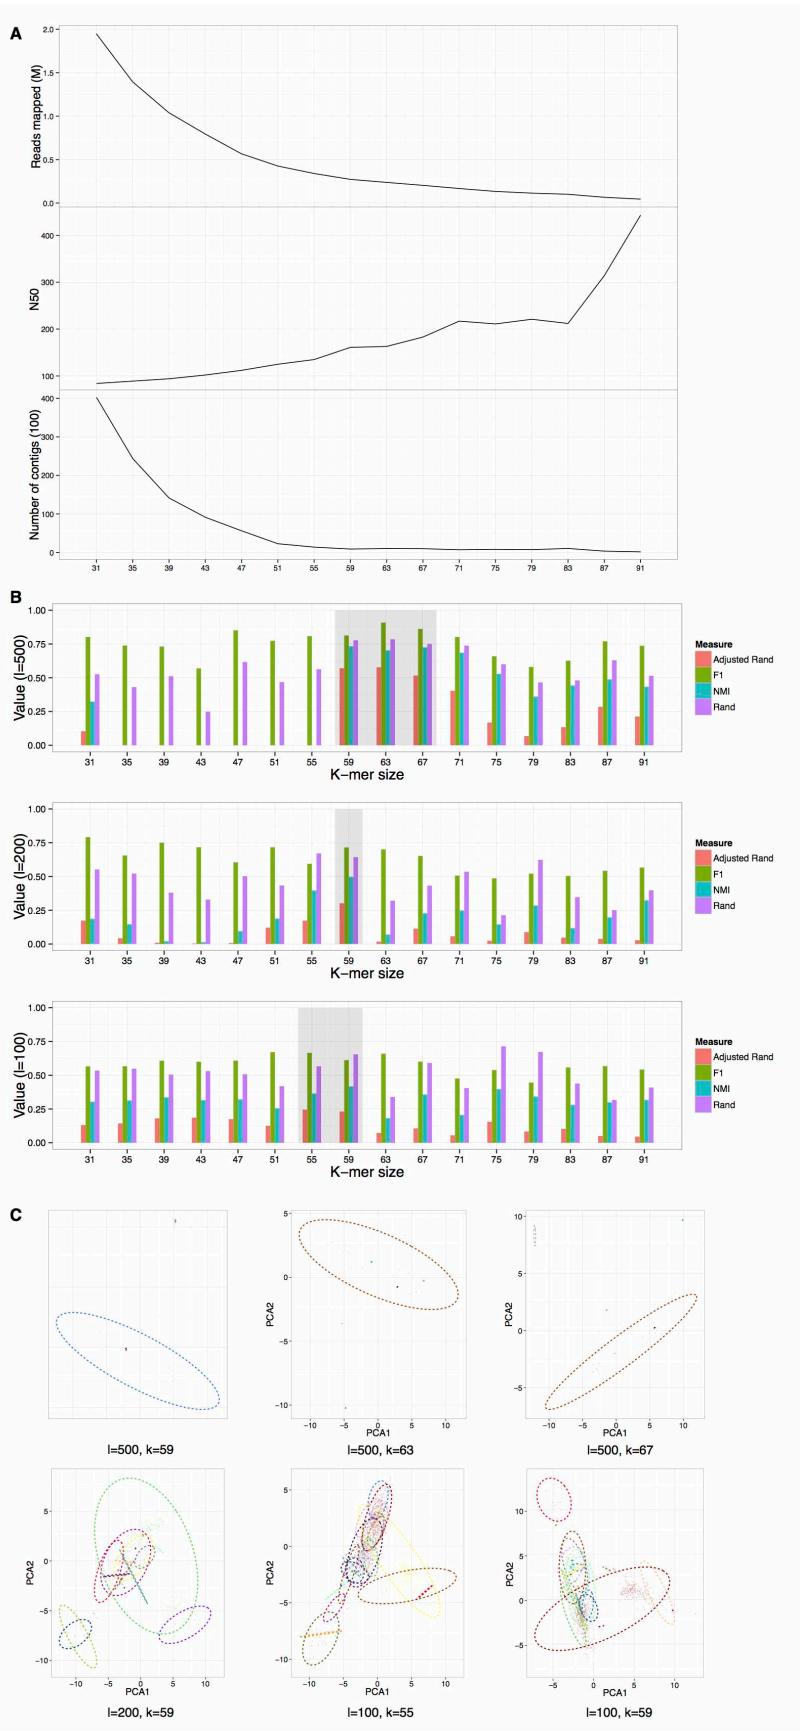

**Figure S12. Bacterial genome assembly.**

**(A) Shotgun metagenome assembly statistics per k-mer size.** (Top)

Number of reads mapped to contigs. (Middle) N50 statistic. (Bottom) Number of contigs.

**(B) Quality metrics of metagenome assembly.** Statistics for cluster quality at different k-mer values (31 to 91) and three thresholds for contig length: All contigs above 500bp (top), all contigs above 200bp (middle), and all contigs above 100bp (bottom). Adjusted Rand = adjusted rand index; F1 measure =  $2 * (\text{precision} * \text{recall}) / (\text{precision} + \text{recall})$ .

NMI = Normalized Mutual Information. Rand = rand index. K-mers that resulted in best overall statistics are shaded (k=59, 63, 67 for >500bp contigs; k=59 for >200bp contigs; k=55, 59 for >100bp contigs). **(C) Contig clusters of genome assembly.** Contig clusters obtained with CONCOCT 0.3.3 using contigs of >500bp (k=59, 63, 67), >200bp (k=59), and >100bp (k=55, 59).
